# Supplementary material for: Three Extraction Methods in Combination with GC×GC-TOFMS for the Detailed Investigation of Volatiles in Chinese Herbaceous Aroma-Type Baijiu
Source: PubMed Central journal article supplement (PMC7582941; doi:10.3390/molecules25194429), 2020-09-27
Supplement: molecules-25-04429-s001.pdf [file molecules-25-04429-s001.pdf]

**Table S1.** Volatile compounds identified in Chinese herbaceous aroma-type Baijiu by HS-SPME-GC×GC-TOFMS, SPE-GC×GC-TOFMS and SBSE-GC×GC-TOFMS.

| NO.           | Compounds                 | CAS number | RT1 <sup>a</sup> | RT2 <sup>b</sup> | Similarity | LRlcal <sup>c</sup> | LRlit <sup>d</sup> | Origin <sup>e</sup> | Identification <sup>f</sup> |
|---------------|---------------------------|------------|------------------|------------------|------------|---------------------|--------------------|---------------------|-----------------------------|
| <b>Esters</b> |                           |            |                  |                  |            |                     |                    |                     |                             |
| 1             | Methyl acetate            | 79-20-9    | 360              | 1.43             | 847        | 832                 | 844                | 1                   | RI, MS, Tent                |
| 2             | Ethyl acetate             | 141-78-6   | 416              | 1.57             | 924        | 904                 | 902                | 1,3                 | RI, MS, STD                 |
| 3             | Ethyl propanoate          | 105-37-3   | 488              | 1.81             | 949        | 963                 | 977                | 1,2,3               | RI, MS, STD                 |
| 4             | Ethyl 2-methyl propanoate | 97-62-1    | 496              | 1.95             | 914        | 969                 | 961                | 1,2,3               | RI, MS, STD                 |
| 5             | Propyl acetate            | 109-60-4   | 508              | 1.77             | 942        | 979                 | 992                | 1,2,3               | RI, MS, STD                 |
| 6             | 2-Butyl acetate           | 105-46-4   | 528              | 1.85             | 918        | 995                 | 985                | 1,2,3               | RI, MS, STD                 |
| 7             | Methyl butanoate          | 623-42-7   | 536              | 1.73             | 841        | 1001                | 997                | 2                   | RI, MS, Tent                |
| 8             | Ethyl acrylate            | 140-88-5   | 544              | 1.67             | 891        | 1006                | 992                | 2,3                 | RI, MS, Tent                |
| 9             | Methyl 2-methylbutyrate   | 868-57-5   | 564              | 1.87             | 875        | 1017                | 1022               | 2                   | RI, MS, Tent                |
| 10            | Isobutyl acetate          | 110-19-0   | 568              | 1.87             | 947        | 1020                | 1025               | 1,2,3               | RI, MS, STD                 |
| 11            | Methyl isovalerate        | 556-24-1   | 580              | 1.85             | 890        | 1027                | 1011               | 2                   | RI, MS, Tent                |
| 12            | Allyl acetate             | 591-87-7   | 600              | 1.63             | 920        | 1038                | 1023               | 2                   | RI, MS, Tent                |
| 13            | Ethyl butanoate           | 105-54-4   | 620              | 2                | 897        | 1050                | 1025               | 1,2,3               | RI, MS, STD                 |
| 14            | Propyl propionate         | 106-36-5   | 620              | 1.99             | 960        | 1050                | 1065               | 2,3                 | RI, MS, Tent                |
| 15            | Ethyl 2-methylbutanoate   | 7452-79-1  | 632              | 2.17             | 849        | 1057                | 1053               | 1,2,3               | RI, MS, STD                 |
| 16            | Butyl acetate             | 123-86-4   | 664              | 1.93             | 892        | 1075                | 1082               | 1,2,3               | RI, MS, STD                 |
| 17            | Ethyl 3-methylbutanoate   | 108-64-5   | 676              | 2.07             | 910        | 1082                | 1067               | 1,2,3               | RI, MS, STD                 |

|    |                                  |            |     |      |     |      |      |       |              |
|----|----------------------------------|------------|-----|------|-----|------|------|-------|--------------|
| 18 | Methyl pentanoate                | 624-24-8   | 684 | 1.93 | 816 | 1086 | 1082 | 1,2,3 | RI, MS, STD  |
| 19 | Isobutyl isobutyrate             | 97-85-8    | 688 | 2.35 | 891 | 1089 | 1092 | 1,2   | RI, MS, Tent |
| 20 | Isobutyl propanoate              | 540-42-1   | 696 | 2    | 913 | 1093 | 1090 | 1,2,3 | RI, MS, Tent |
| 21 | Propyl butyrate                  | 105-66-8   | 748 | 2.3  | 932 | 1120 | 1135 | 1,2,3 | RI, MS, STD  |
| 22 | 3-Methylbutyl acetate            | 123-92-2   | 756 | 2.11 | 934 | 1124 | 1131 | 1,2,3 | RI, MS, STD  |
| 23 | sec-Butyl butyrate               | 819-97-6   | 772 | 2.45 | 856 | 1133 | 1158 | 1,2,3 | RI, MS, Tent |
| 24 | Propyl 2-methylbutanoate         | 37064-20-3 | 784 | 2.51 | 884 | 1139 | 1150 | 1,2   | RI, MS, Tent |
| 25 | Butyl propionate                 | 590-01-2   | 788 | 2.21 | 963 | 1141 | 1159 | 2     | RI, MS, Tent |
| 26 | 1-Methylpropyl 2-methylbutanoate | 869-08-9   | 796 | 2.64 | 825 | 1145 | 1148 | 1     | RI, MS, Tent |
| 27 | Butyl isobutyrate                | 97-87-0    | 796 | 2.41 | 936 | 1145 | 1149 | 2     | RI, MS, Tent |
| 28 | Propyl isovalerate               | 557-00-6   | 812 | 2.44 | 886 | 1153 | 1153 | 1,2,3 | RI, MS, Tent |
| 29 | Isobutyl isovalerate             | 589-59-3   | 832 | 2.52 | 845 | 1163 | 1190 | 2     | RI, MS, Tent |
| 30 | Ethyl valerate                   | 539-82-2   | 836 | 2.13 | 951 | 1165 | 1159 | 1,2,3 | RI, MS, STD  |
| 31 | Ethyl 2-butenolate               | 10544-63-5 | 844 | 1.92 | 929 | 1169 | 1172 | 2,3   | RI, MS, Tent |
| 32 | Isobutyl butyrate                | 539-90-2   | 852 | 2.32 | 900 | 1173 | 1185 | 1,2   | RI, MS, Tent |
| 33 | Isobutyl 2-methylbutanoate       | 2445-67-2  | 856 | 2.57 | 905 | 1175 | 1179 | 2     | RI, MS, Tent |
| 34 | Allyl butanoate                  | 2051-78-7  | 860 | 1.99 | 883 | 1177 | 1180 | 2     | RI, MS, Tent |
| 35 | Ethyl 3-methylvalerate           | 5870-68-8  | 860 | 2.33 | 844 | 1177 | 1181 | 2     | RI, MS, Tent |
| 36 | Isopentyl isobutyrate            | 2050-1-3   | 892 | 2.6  | 923 | 1193 | 1183 | 1     | RI, MS, Tent |
| 37 | Methyl hexanoate                 | 106-70-7   | 892 | 2.16 | 834 | 1193 | 1183 | 1,2,3 | RI, MS, Tent |
| 38 | Amyl acetate                     | 628-63-7   | 900 | 2.05 | 823 | 1197 | 1195 | 1,2,3 | RI, MS, Tent |

|    |                             |            |      |      |     |      |      |       |              |
|----|-----------------------------|------------|------|------|-----|------|------|-------|--------------|
| 39 | Ethyl 4-methylvalerate      | 25415-67-2 | 932  | 2.3  | 849 | 1213 | 1204 | 1,2,3 | RI, MS, Tent |
| 40 | 2-Pentyl butanoate          | 60415-61-4 | 932  | 2.63 | 913 | 1213 | 1216 | 2,3   | RI, MS, Tent |
| 41 | Isoamyl propionate          | 105-68-0   | 940  | 2.25 | 897 | 1217 | 1188 | 3     | RI, MS, Tent |
| 42 | Butyl butyrate              | 109-21-7   | 940  | 2.46 | 954 | 1217 | 1215 | 1,2   | RI, MS, Tent |
| 43 | Propyl valerate             | 141-06-0   | 964  | 2.39 | 792 | 1228 | 1233 | 1,2   | RI, MS, Tent |
| 44 | 2-Butyl-n-valerate          | 23361-74-2 | 988  | 2.6  | 835 | 1240 | 1224 | 2     | RI, MS, Tent |
| 45 | Pentyl isobutyrate          | 2445-72-9  | 1012 | 2.58 | 905 | 1251 | 1241 | 2     | RI, MS, Tent |
| 46 | Butyl isovalerate           | 109-19-3   | 1020 | 2.5  | 956 | 1255 | 1252 | 2     | RI, MS, Tent |
| 47 | Isobutyl valerate           | 10588-10-0 | 1032 | 2.51 | 911 | 1261 | 1253 | 2     | RI, MS, Tent |
| 48 | Ethyl hexanoate             | 123-66-0   | 1032 | 2.53 | 909 | 1261 | 1240 | 1,2,3 | RI, MS, STD  |
| 49 | 1-Methylhexyl acetate       | 5921-82-4  | 1044 | 2.34 | 830 | 1267 | 1266 | 2     | RI, MS, Tent |
| 50 | Isopentyl butanoate         | 106-27-4   | 1096 | 2.42 | 893 | 1292 | 1289 | 1     | RI, MS, Tent |
| 51 | Hexyl acetate               | 142-92-7   | 1104 | 2.14 | 913 | 1296 | 1277 | 1,2,3 | RI, MS, STD  |
| 52 | Isopentyl 2-methylbutanoate | 27625-35-0 | 1112 | 2.6  | 920 | 1300 | 1274 | 1,2,3 | RI, MS, Tent |
| 53 | Methyl heptanoate           | 106-73-0   | 1124 | 2.22 | 918 | 1306 | 1327 | 1,3   | RI, MS, Tent |
| 54 | Isopentyl isovalerate       | 659-70-1   | 1136 | 2.57 | 940 | 1312 | 1312 | 1,2   | RI, MS, Tent |
| 55 | Ethyl (E)-3-hexenoate       | 26553-46-8 | 1148 | 2.16 | 946 | 1317 | 1303 | 1,2,3 | RI, MS, Tent |
| 56 | Ethyl lactate               | 97-64-3    | 1180 | 1.51 | 976 | 1333 | 1309 | 3     | RI, MS, Tent |
| 57 | Propyl hexanoate            | 626-77-7   | 1192 | 2.56 | 854 | 1340 | 1313 | 1,2,3 | RI, MS, STD  |
| 58 | (Z)-3-hexen-1-yl acetate    | 3681-71-8  | 1196 | 2.05 | 823 | 1341 | 1346 | 3     | RI, MS, Tent |
| 59 | Ethyl 2-hydroxypropanoate   | 687-47-8   | 1200 | 1.51 | 969 | 1343 | 1356 | 2,3   | RI, MS, Tent |

|    |                                  |            |      |      |     |      |      |       |              |
|----|----------------------------------|------------|------|------|-----|------|------|-------|--------------|
| 60 | Amyl 2-methylbutyrate            | 68039-26-9 | 1208 | 2.65 | 857 | 1348 | 1327 | 1,2,3 | RI, MS, Tent |
| 61 | Ethyl $\beta$ -ethoxypropionate  | 763-69-9   | 1208 | 2.03 | 919 | 1347 | 1320 | 1,2,3 | RI, MS, Tent |
| 62 | Ethyl 2-hexenoate                | 1552-67-6  | 1212 | 2.29 | 892 | 1349 | 1328 | 2     | RI, MS, STD  |
| 63 | Ethyl heptanoate                 | 106-30-9   | 1224 | 2.46 | 813 | 1355 | 1341 | 1,2,3 | RI, MS, STD  |
| 64 | Hexyl propanoate                 | 2445-76-3  | 1228 | 2.44 | 921 | 1357 | 1353 | 1,2,3 | RI, MS, Tent |
| 65 | Hexyl isobutyrate                | 2349-7-7   | 1232 | 2.63 | 945 | 1359 | 1342 | 1,2,3 | RI, MS, Tent |
| 66 | Amyl isovalerate                 | 25415-62-7 | 1240 | 2.59 | 922 | 1363 | 1350 | 1,2,3 | RI, MS, Tent |
| 67 | Isobutyl hexanoate               | 105-79-3   | 1248 | 2.64 | 906 | 1367 | 1347 | 1,2,3 | RI, MS, Tent |
| 68 | Isoamyl valerate                 | 2050-9-1   | 1260 | 2.62 | 910 | 1373 | 1346 | 1,2,3 | RI, MS, Tent |
| 69 | 2-Propenyl hexanoate             | 123-68-2   | 1276 | 2.24 | 875 | 1381 | 1370 | 1,2   | RI, MS, Tent |
| 70 | Heptyl acetate                   | 112-06-1   | 1280 | 2.31 | 929 | 1383 | 1385 | 1,2,3 | RI, MS, STD  |
| 71 | Ethyl Z-4-heptenoate             | 54340-70-4 | 1288 | 2.29 | 892 | 1387 | 1377 | 1,3   | RI, MS, Tent |
| 72 | Methyl octanoate                 | 111-11-5   | 1308 | 2.36 | 916 | 1397 | 1399 | 1,2,3 | RI, MS, Tent |
| 73 | 2-Heptyl butanoate               | 39026-94-3 | 1312 | 2.77 | 856 | 1399 | 1401 | 2,3   | RI, MS, STD  |
| 74 | Cyclopentyl butyrate             | 6290-13-7  | 1324 | 2.54 | 826 | 1405 | 1387 | 1     | RI, MS, Tent |
| 75 | Ethyl 2-hydroxybutyrate          | 52089-54-0 | 1336 | 1.58 | 858 | 1411 | 1400 | 1,2   | RI, MS, Tent |
| 76 | Ethyl 3-hydroxy-3-methylbutyrate | 18267-36-2 | 1340 | 1.7  | 870 | 1413 | 1400 | 2     | RI, MS, Tent |
| 77 | Butyl hexanoate                  | 626-82-4   | 1352 | 2.67 | 928 | 1420 | 1406 | 1,2,3 | RI, MS, STD  |
| 78 | Propyl heptanoate                | 7778-87-2  | 1352 | 2.64 | 947 | 1420 | 1425 | 2,3   | RI, MS, STD  |
| 79 | Hexyl butanoate                  | 2639-63-6  | 1368 | 2.6  | 826 | 1428 | 1430 | 1,2,3 | RI, MS, STD  |
| 80 | Isopropyl octanoate              | 5458-59-3  | 1376 | 2.72 | 852 | 1433 | 1419 | 2,3   | RI, MS, Tent |

|     |                                  |            |      |      |     |      |      |       |              |
|-----|----------------------------------|------------|------|------|-----|------|------|-------|--------------|
| 81  | Propyl lactate                   | 616-09-1   | 1376 | 1.58 | 940 | 1432 | 1424 | 1,2,3 | RI, MS, Tent |
| 82  | Ethyl 2-hydroxy-3-methylbutyrate | 2441-6-7   | 1380 | 1.68 | 944 | 1434 | 1427 | 1,2,3 | RI, MS, Tent |
| 83  | Hexyl 2-methylbutyrate           | 10032-15-2 | 1384 | 2.77 | 896 | 1437 | 1431 | 1,2,3 | RI, MS, Tent |
| 84  | Ethyl cyclohexanoate             | 3289-28-9  | 1384 | 2.51 | 933 | 1437 | 1429 | 1,2,3 | RI, MS, Tent |
| 85  | Ethyl octoate                    | 106-32-1   | 1392 | 2.51 | 919 | 1441 | 1435 | 1,2,3 | RI, MS, STD  |
| 86  | Heptyl propionate                | 2216-81-1  | 1412 | 2.52 | 818 | 1451 | 1455 | 1,3   | RI, MS, Tent |
| 87  | Hexyl isopentanoate              | 10032-13-0 | 1416 | 2.7  | 936 | 1453 | 1425 | 1,2,3 | RI, MS, Tent |
| 88  | Isoamyl hexanoate                | 2198-61-0  | 1428 | 2.77 | 893 | 1460 | 1453 | 2,3   | RI, MS, STD  |
| 89  | Isobutyl heptanoate              | 7779-80-8  | 1428 | 2.71 | 911 | 1460 | 1448 | 1     | RI, MS, STD  |
| 90  | Isobutyl lactate                 | 585-24-0   | 1440 | 1.62 | 902 | 1465 | 1455 | 1,2,3 | RI, MS, Tent |
| 91  | 2-Methylbutyl hexanoate          | 2601-13-0  | 1444 | 2.9  | 843 | 1468 | 1458 | 1,2   | RI, MS, Tent |
| 92  | 2-Ethylhexyl 2-propenoate        | 103-11-7   | 1484 | 2.51 | 893 | 1489 | 1494 | 1     | RI, MS, Tent |
| 93  | Ethyl 7-octenoate                | 35194-38-8 | 1488 | 2.35 | 919 | 1491 | 1478 | 1,2,3 | RI, MS, Tent |
| 94  | Ethyl diethoxyacetate            | 6065-82-3  | 1496 | 2.05 | 929 | 1495 | 1487 | 1,2,3 | RI, MS, Tent |
| 95  | Methyl nonanoate                 | 1731-84-6  | 1500 | 2.45 | 810 | 1497 | 1481 | 1     | RI, MS, Tent |
| 96  | Pentyl hexanoate                 | 540-07-8   | 1536 | 2.82 | 859 | 1517 | 1501 | 1,2,3 | RI, MS, STD  |
| 97  | Ethyl 3-hydroxybutyrate          | 5405-41-4  | 1544 | 1.56 | 912 | 1520 | 1522 | 1,2   | RI, MS, Tent |
| 98  | Heptyl butanoate                 | 5870-93-9  | 1544 | 2.69 | 885 | 1521 | 1522 | 1     | RI, MS, Tent |
| 99  | Butyl 2-hydroxypropanoate        | 138-22-7   | 1552 | 1.64 | 894 | 1525 | 1520 | 1,2,3 | RI, MS, STD  |
| 100 | Propyl octanoate                 | 624-13-5   | 1552 | 2.69 | 919 | 1525 | 1514 | 1,2,3 | RI, MS, STD  |
| 101 | Heptyl 2-methylbutanoate         | 50862-12-9 | 1560 | 2.88 | 836 | 1530 | 1516 | 1     | RI, MS, Tent |

|     |                                    |            |      |      |     |      |      |       |              |
|-----|------------------------------------|------------|------|------|-----|------|------|-------|--------------|
| 102 | Ethyl nonanoate                    | 123-29-5   | 1580 | 2.62 | 943 | 1541 | 1526 | 1,2,3 | RI, MS, STD  |
| 103 | Octyl propanoate                   | 142-60-9   | 1588 | 2.63 | 915 | 1545 | 1539 | 1     | RI, MS, Tent |
| 104 | Ethyl 2-hydroxy-4-methylpentanoate | 10348-47-7 | 1592 | 1.74 | 913 | 1547 | 1547 | 1,3   | RI, MS, Tent |
| 105 | Ethyl E-2-octenoate                | 7367-82-0  | 1612 | 2.42 | 901 | 1558 | 1540 | 3     | RI, MS, Tent |
| 106 | Isopentyl heptanoate               | 109-25-1   | 1616 | 2.82 | 942 | 1561 | 1552 | 3     | RI, MS, Tent |
| 107 | Nonyl acetate                      | 143-13-5   | 1652 | 2.5  | 873 | 1580 | 1593 | 1     | RI, MS, Tent |
| 108 | Ethyl 3-acetoxybutanoate           | 27846-49-7 | 1656 | 1.88 | 849 | 1582 | 1570 | 3     | RI, MS, Tent |
| 109 | Diethyl propanedioate              | 105-53-3   | 1660 | 1.82 | 829 | 1584 | 1595 | 1,2,3 | RI, MS, STD  |
| 110 | 2-Heptyl hexanoate                 | 6624-58-4  | 1668 | 2.94 | 904 | 1589 | 1599 | 1,2,3 | RI, MS, Tent |
| 111 | 2-Camphanol acetate                | 76-49-3    | 1668 | 2.67 | 932 | 1589 | 1590 | 3     | RI, MS, Tent |
| 112 | 3-methyl-2-butenyl hexanoate       | 76649-22-4 | 1672 | 2.54 | 852 | 1591 | 1572 | 1     | RI, MS, Tent |
| 113 | Methyl decanoate                   | 110-42-9   | 1684 | 2.52 | 922 | 1597 | 1585 | 1,3   | RI, MS, Tent |
| 114 | Hexyl hexanoate                    | 6378-65-0  | 1712 | 2.85 | 846 | 1613 | 1599 | 1,2,3 | RI, MS, STD  |
| 115 | Ethyl levulate                     | 539-88-8   | 1724 | 1.8  | 890 | 1619 | 1610 | 1,2,3 | RI, MS, Tent |
| 116 | Octyl butanoate                    | 110-39-4   | 1728 | 2.72 | 808 | 1622 | 1624 | 1,2   | RI, MS, Tent |
| 117 | Butyl octanoate                    | 589-75-3   | 1728 | 2.76 | 829 | 1622 | 1619 | 1,2   | RI, MS, Tent |
| 118 | Octyl 2-methylbutanoate            | 29811-50-5 | 1740 | 2.97 | 820 | 1628 | 1623 | 1     | RI, MS, Tent |
| 119 | Methyl benzoate                    | 93-58-3    | 1756 | 1.96 | 905 | 1636 | 1637 | 1,2,3 | RI, MS, Tent |
| 120 | Ethyl decanoate                    | 110-38-3   | 1760 | 2.87 | 868 | 1639 | 1648 | 1,2,3 | RI, MS, STD  |
| 121 | Ethyl methyl butanedioate          | 627-73-6   | 1760 | 1.88 | 909 | 1639 | 1631 | 2,3   | RI, MS, Tent |
| 122 | Diethyl fumarate                   | 623-91-6   | 1788 | 2.03 | 915 | 1654 | 1647 | 1,2,3 | RI, MS, Tent |

|     |                               |            |      |      |     |      |      |       |              |
|-----|-------------------------------|------------|------|------|-----|------|------|-------|--------------|
| 123 | Isoamyl octanoate             | 2035-99-6  | 1796 | 3.2  | 941 | 1659 | 1658 | 1,2,3 | RI, MS, Tent |
| 124 | Ethyl trans-4-decenoate       | 76649-16-6 | 1808 | 2.84 | 927 | 1665 | 1680 | 1,3   | RI, MS, STD  |
| 125 | Isopropyl benzoate            | 939-48-0   | 1808 | 2.3  | 876 | 1665 | 1676 | 1,3   | RI, MS, Tent |
| 126 | Diethyl succinate             | 123-25-1   | 1832 | 2.1  | 970 | 1678 | 1694 | 1,2,3 | RI, MS, Tent |
| 127 | Ethyl benzoate                | 93-89-0    | 1832 | 2.22 | 970 | 1678 | 1652 | 1,2,3 | RI, MS, STD  |
| 128 | Ethyl 3-hydroxyhexanoate      | 2305-25-1  | 1836 | 1.85 | 850 | 1680 | 1652 | 2     | RI, MS, Tent |
| 129 | Ethyl cis-4-decenoate         | 7367-84-2  | 1844 | 2.89 | 888 | 1685 | 1699 | 1     | RI, MS, Tent |
| 130 | Ethyl 9-decenoate             | 67233-91-4 | 1856 | 2.81 | 793 | 1692 | 1703 | 1     | RI, MS, STD  |
| 131 | $\alpha$ -Terpineol acetate   | 80-26-2    | 1876 | 2.66 | 871 | 1702 | 1700 | 1     | RI, MS, STD  |
| 132 | $\alpha$ -Phenylethyl acetate | 93-92-5    | 1892 | 2.07 | 861 | 1711 | 1693 | 3     | RI, MS, Tent |
| 133 | Propyl decanoate              | 30673-60-0 | 1928 | 2.94 | 908 | 1731 | 1720 | 2,3   | RI, MS, Tent |
| 134 | Benzyl acetate                | 140-11-4   | 1948 | 1.95 | 907 | 1741 | 1762 | 1,2,3 | RI, MS, Tent |
| 135 | Ethyl undecanoate             | 627-90-7   | 1948 | 2.84 | 941 | 1742 | 1744 | 1,2,3 | RI, MS, STD  |
| 136 | Butyl butyrolactate           | 7492-70-8  | 1956 | 2.35 | 830 | 1746 | 1733 | 1     | RI, MS, Tent |
| 137 | Ethyl trans-2-decenoate       | 37486-72-9 | 1992 | 2.55 | 881 | 1766 | 1750 | 1     | RI, MS, Tent |
| 138 | Propyl benzoate               | 2315-68-6  | 2000 | 2.15 | 937 | 1770 | 1777 | 1     | RI, MS, Tent |
| 139 | Methyl phenylacetate          | 101-41-7   | 2004 | 1.93 | 832 | 1772 | 1758 | 1,2,3 | RI, MS, Tent |
| 140 | Ethyl glutarate               | 818-38-2   | 2032 | 1.96 | 855 | 1787 | 1768 | 2,3   | RI, MS, Tent |
| 141 | Benzyl isobutanoate           | 103-28-6   | 2036 | 2.12 | 865 | 1790 | 1797 | 1     | RI, MS, Tent |
| 142 | Methyl salicylate             | 119-36-8   | 2044 | 1.88 | 814 | 1794 | 1781 | 3     | RI, MS, STD  |
| 143 | Ethyl phenylacetate           | 101-97-3   | 2048 | 2    | 894 | 1796 | 1785 | 1,3   | RI, MS, STD  |

|     |                                  |            |      |      |     |      |      |       |              |
|-----|----------------------------------|------------|------|------|-----|------|------|-------|--------------|
| 144 | Isobutyl benzoate                | 120-50-3   | 2056 | 2.17 | 926 | 1801 | 1806 | 1,2,3 | RI, MS, Tent |
| 145 | Benzyl propionate                | 122-63-4   | 2060 | 1.99 | 932 | 1803 | 1784 | 1,3   | RI, MS, Tent |
| 146 | Hexyl octanoate                  | 1117-55-1  | 2080 | 2.74 | 877 | 1817 | 1804 | 1,2,3 | RI, MS, STD  |
| 147 | $\beta$ -Phenethyl acetate       | 103-45-7   | 2096 | 1.94 | 972 | 1827 | 1835 | 1,2,3 | RI, MS, Tent |
| 148 | Ethyl dodecanoate                | 106-33-2   | 2128 | 2.61 | 940 | 1848 | 1860 | 1,2,3 | RI, MS, STD  |
| 149 | Methyl benzenepropanoate         | 103-25-3   | 2148 | 1.91 | 875 | 1861 | 1857 | 1,3   | RI, MS, Tent |
| 150 | n-Butyl benzoate                 | 136-60-7   | 2172 | 2.08 | 824 | 1877 | 1879 | 1     | RI, MS, Tent |
| 151 | Benzyl butanoate                 | 103-37-7   | 2184 | 1.99 | 945 | 1884 | 1856 | 3     | RI, MS, Tent |
| 152 | $\beta$ -Phenylethyl isobutyrate | 103-48-0   | 2196 | 2.07 | 890 | 1892 | 1900 | 3     | RI, MS, Tent |
| 153 | Ethyl 3-phenylpropionate         | 2021-28-5  | 2204 | 2.04 | 873 | 1898 | 1900 | 1,2,3 | RI, MS, STD  |
| 154 | Propyl dodecanoate               | 3681-78-5  | 2244 | 2.56 | 832 | 1927 | 1931 | 1,3   | RI, MS, Tent |
| 155 | Isoamyl benzoate                 | 94-46-2    | 2244 | 2.09 | 931 | 1926 | 1928 | 1,3   | RI, MS, Tent |
| 156 | Benzenepropyl acetate            | 122-72-5   | 2284 | 1.9  | 868 | 1955 | 1971 | 1,3   | RI, MS, STD  |
| 157 | Butyl phenylacetate              | 122-43-0   | 2304 | 2.01 | 876 | 1970 | 1970 | 1,2,3 | RI, MS, STD  |
| 158 | 2-Phenylethyl butanoate          | 103-52-6   | 2312 | 2.01 | 927 | 1976 | 1968 | 1,3   | RI, MS, Tent |
| 159 | Phenethyl 2-methylbutyrate       | 24817-51-4 | 2320 | 2.08 | 862 | 1981 | 1968 | 1     | RI, MS, Tent |
| 160 | Phenethyl isovalerate            | 140-26-1   | 2344 | 2.04 | 905 | 1999 | 1986 | 1,2,3 | RI, MS, STD  |
| 161 | Ethyl tetradecanoate             | 124-06-1   | 2400 | 2.27 | 933 | 2047 | 2053 | 2,3   | RI, MS, STD  |
| 162 | Diethyl dl-malate                | 626-11-9   | 2404 | 1.5  | 917 | 2050 | 2062 | 2     | RI, MS, Tent |
| 163 | Triacetyl glycerol               | 102-76-1   | 2440 | 1.53 | 973 | 2080 | 2077 | 2     | RI, MS, Tent |
| 164 | Diethyl octanedioate             | 2050-23-9  | 2472 | 1.78 | 842 | 2110 | 2114 | 2,3   | RI, MS, Tent |



|                 |                           |             |      |      |     |      |      |       |              |
|-----------------|---------------------------|-------------|------|------|-----|------|------|-------|--------------|
| 165             | Ethyl cinnamate           | 103-36-6    | 2512 | 1.68 | 947 | 2151 | 2156 | 1,2,3 | RI, MS, STD  |
| 166             | Ethyl pentadecanoate      | 41114-00-5  | 2512 | 2.09 | 916 | 2152 | 2140 | 1,2,3 | RI, MS, STD  |
| 167             | Hexyl phenylacetate       | 5421-17-0   | 2536 | 1.88 | 910 | 2176 | 2148 | 1,2   | RI, MS, Tent |
| 168             | Methyl hexadecanoate      | 112-39-0    | 2572 | 2.21 | 918 | 2215 | 2245 | 3     | RI, MS, Tent |
| 169             | Ethyl hexadecanoate       | 628-97-7    | 2604 | 2.41 | 949 | 2251 | 2240 | 1,2,3 | RI, MS, STD  |
| 170             | Ethyl hexadec-9-enoate    | 54546-22-4  | 2632 | 2.44 | 894 | 2282 | 2267 | 2,3   | RI, MS, Tent |
| 171             | Hexyl dihydrocinnamate    | 220766-75-6 | 2644 | 2.15 | 868 | 2295 | 2296 | 1     | RI, MS, Tent |
| 172             | Ethyl heptadecanoate      | 14010-23-2  | 2668 | 2.66 | 832 | 2321 | 2340 | 2,3   | RI, MS, Tent |
| 173             | Propyl hexadecanoate      | 2239-78-3   | 2684 | 2.75 | 833 | 2337 | 2335 | 3     | RI, MS, Tent |
| 174             | Ethyl hydrogen succinate  | 1070-34-4   | 2732 | 1.36 | 900 | 2386 | 2395 | 1,2   | RI, MS, Tent |
| 175             | Butyl hexadecanoate       | 111-06-8    | 2776 | 3.25 | 882 | 2430 | 2419 | 3     | RI, MS, Tent |
| 176             | Ethyl octadecanoate       | 111-61-5    | 2800 | 3.3  | 939 | 2453 | 2483 | 3     | RI, MS, Tent |
| 177             | Ethyl cis-9-octadecenoate | 111-62-6    | 2824 | 3.37 | 882 | 2476 | 2476 | 2,3   | RI, MS, Tent |
| 178             | Ethyl linoleate           | 544-35-4    | 2880 | 3.5  | 936 | 2526 | 2521 | 2,3   | RI, MS, Tent |
| 179             | Ethyl vanillate           | 617-05-0    | 3056 | 2    | 873 | 2656 | 2668 | 2,3   | RI, MS, Tent |
| <b>Alcohols</b> |                           |             |      |      |     |      |      |       |              |
| 180             | 2-Propanol                | 67-63-0     | 440  | 1.4  | 963 | 924  | 935  | 1     | RI, MS, STD  |
| 181             | 2-Butanol                 | 78-92-2     | 584  | 1.48 | 934 | 1029 | 1048 | 1,2,3 | RI, MS, STD  |
| 182             | 1-Propanol                | 71-23-8     | 612  | 1.45 | 934 | 1045 | 1046 | 1,3   | RI, MS, STD  |
| 183             | 2-Methyl-3-buten-2-ol     | 115-18-4    | 620  | 1.42 | 826 | 1049 | 1036 | 2     | RI, MS, Tent |
| 184             | 2-Methyl-1-propanol       | 78-83-1     | 716  | 1.48 | 961 | 1104 | 1108 | 1,2,3 | RI, MS, STD  |

|     |                       |           |      |      |     |      |      |       |              |
|-----|-----------------------|-----------|------|------|-----|------|------|-------|--------------|
| 185 | 3-Pentanol            | 584-02-1  | 740  | 1.52 | 887 | 1116 | 1097 | 2     | RI, MS, Tent |
| 186 | 2-Pentanol            | 6032-29-7 | 764  | 1.52 | 957 | 1128 | 1130 | 2,3   | RI, MS, STD  |
| 187 | 1-Butanol             | 71-36-3   | 800  | 1.47 | 954 | 1146 | 1120 | 1,2,3 | RI, MS, STD  |
| 188 | 2-Methyl-3-pentanol   | 565-67-3  | 824  | 1.61 | 813 | 1158 | 1167 | 1     | RI, MS, Tent |
| 189 | 3-Penten-2-ol         | 1569-50-2 | 852  | 1.46 | 916 | 1172 | 1163 | 2     | RI, MS, Tent |
| 190 | 3-Hexanol             | 623-37-0  | 904  | 1.59 | 834 | 1199 | 1206 | 2     | RI, MS, STD  |
| 191 | 2-Methylbutanol       | 137-32-6  | 920  | 1.52 | 957 | 1207 | 1197 | 1,2   | RI, MS, STD  |
| 192 | 3-Methyl-1-butanol    | 123-51-3  | 944  | 1.49 | 951 | 1218 | 1208 | 1,2,3 | RI, MS, STD  |
| 193 | 2-Hexanol             | 626-93-7  | 956  | 1.58 | 950 | 1224 | 1226 | 1,2,3 | RI, MS, STD  |
| 194 | 3-Methyl-3-buten-1-ol | 763-32-6  | 1020 | 1.56 | 831 | 1255 | 1274 | 1,2   | RI, MS, STD  |
| 195 | 1-Pentanol            | 71-41-0   | 1024 | 1.61 | 975 | 1257 | 1256 | 1,2,3 | RI, MS, STD  |
| 196 | 4-Heptanol            | 589-55-9  | 1104 | 1.67 | 825 | 1295 | 1290 | 1,2,3 | RI, MS, Tent |
| 197 | 2-(Z)-Pentenol        | 1576-95-0 | 1120 | 1.43 | 823 | 1303 | 1322 | 2     | RI, MS, STD  |
| 198 | (S)-2-Heptanol        | 6033-23-4 | 1120 | 1.66 | 952 | 1303 | 1307 | 3     | RI, MS, Tent |
| 199 | 2-Ethyl-1-butanol     | 97-95-0   | 1124 | 1.55 | 930 | 1305 | 1318 | 2,3   | RI, MS, Tent |
| 200 | 2-Methyl-1-pentanol   | 105-30-6  | 1136 | 1.52 | 846 | 1311 | 1337 | 3     | RI, MS, Tent |
| 201 | Cyclopentanol         | 96-41-3   | 1136 | 1.52 | 906 | 1311 | 1298 | 1,2   | RI, MS, STD  |
| 202 | Prenol                | 556-82-1  | 1156 | 1.46 | 927 | 1321 | 1325 | 2,3   | RI, MS, Tent |
| 203 | 4-Methyl-1-pentanol   | 626-89-1  | 1156 | 1.52 | 931 | 1321 | 1338 | 1,3   | RI, MS, STD  |
| 204 | 2-Heptanol            | 543-49-7  | 1164 | 1.65 | 959 | 1325 | 1327 | 1,2,3 | RI, MS, STD  |
| 205 | 3-Methyl-1-pentanol   | 589-35-5  | 1176 | 1.53 | 907 | 1331 | 1344 | 1,2,3 | RI, MS, STD  |

|     |                        |            |      |      |     |      |      |       |              |
|-----|------------------------|------------|------|------|-----|------|------|-------|--------------|
| 206 | 3-Methyl-cyclopentanol | 18729-48-1 | 1192 | 1.57 | 874 | 1339 | 1342 | 2     | RI, MS, Tent |
| 207 | 1-Hexanol              | 111-27-3   | 1236 | 1.7  | 879 | 1361 | 1356 | 1,2,3 | RI, MS, STD  |
| 208 | 3-Hexen-1-ol           | 544-12-7   | 1252 | 1.52 | 873 | 1369 | 1384 | 1     | RI, MS, Tent |
| 209 | 5-Methyl-2-heptanol    | 54630-50-1 | 1264 | 1.68 | 898 | 1375 | 1394 | 3     | RI, MS, STD  |
| 210 | 3-Ethoxy-1-propanol    | 111-35-3   | 1276 | 1.53 | 880 | 1381 | 1376 | 1,2   | RI, MS, Tent |
| 211 | 4-Octanol              | 589-62-8   | 1280 | 1.75 | 926 | 1383 | 1376 | 1,3   | RI, MS, Tent |
| 212 | 4-Methyl-3-penten-1-ol | 763-89-3   | 1288 | 1.52 | 874 | 1387 | 1390 | 2,3   | RI, MS, Tent |
| 213 | 3-Octanol              | 589-98-0   | 1300 | 1.76 | 963 | 1393 | 1394 | 1,2,3 | RI, MS, STD  |
| 214 | Cyclohexanol           | 108-93-0   | 1320 | 1.62 | 832 | 1403 | 1403 | 2     | RI, MS, Tent |
| 215 | 2-Butoxy-ethanol       | 111-76-2   | 1328 | 1.58 | 862 | 1407 | 1402 | 1,2,3 | RI, MS, Tent |
| 216 | cis-2-Hexenol          | 928-94-9   | 1328 | 1.61 | 807 | 1407 | 1403 | 3     | RI, MS, STD  |
| 217 | 3-Methyl-1-hexanol     | 13231-81-7 | 1336 | 1.6  | 889 | 1411 | 1413 | 1,3   | RI, MS, Tent |
| 218 | 5-Hexen-1-ol           | 821-41-0   | 1336 | 1.51 | 857 | 1411 | 1394 | 1     | RI, MS, STD  |
| 219 | 4-Methyl-1-hexanol     | 818-49-5   | 1376 | 1.61 | 909 | 1432 | 1434 | 1,2,3 | RI, MS, STD  |
| 220 | 1-Octen-3-ol           | 3391-86-4  | 1412 | 1.66 | 974 | 1451 | 1462 | 1,2,3 | RI, MS, STD  |
| 221 | 1-Heptanol             | 111-70-6   | 1420 | 1.65 | 959 | 1455 | 1440 | 1,2,3 | RI, MS, STD  |
| 222 | 6-Methyl-5-hepten-2-ol | 1569-60-4  | 1436 | 1.68 | 837 | 1463 | 1464 | 1,2,3 | RI, MS, STD  |
| 223 | 4-Nonanol              | 5932-79-6  | 1464 | 1.85 | 916 | 1478 | 1467 | 1,3   | RI, MS, STD  |
| 224 | 2-Ethyl-1-hexanol      | 104-76-7   | 1484 | 1.7  | 959 | 1488 | 1484 | 1,2,3 | RI, MS, STD  |
| 225 | 4-Hepten-1-ol          | 20851-55-2 | 1512 | 1.58 | 817 | 1503 | 1502 | 1,2   | RI, MS, STD  |
| 226 | (E)-2-Hepten-1-ol      | 33467-76-4 | 1524 | 1.57 | 822 | 1510 | 1504 | 1,2,3 | RI, MS, STD  |

---

|     |                            |            |      |      |     |      |      |       |              |
|-----|----------------------------|------------|------|------|-----|------|------|-------|--------------|
| 227 | 2-Nonanol                  | 628-99-9   | 1536 | 1.81 | 931 | 1516 | 1489 | 1,2,3 | RI, MS, STD  |
| 228 | 1-Octanol                  | 111-87-5   | 1608 | 1.72 | 947 | 1556 | 1559 | 1,2,3 | RI, MS, STD  |
| 229 | p-Menthan-8-ol             | 498-81-7   | 1624 | 1.99 | 863 | 1564 | 1569 | 3     | RI, MS, Tent |
| 230 | 5-Decanol                  | 5205-34-5  | 1640 | 1.93 | 828 | 1573 | 1574 | 1     | RI, MS, Tent |
| 231 | [S,S]-2,3-Butanediol       | 19132-06-0 | 1648 | 1.34 | 859 | 1577 | 1581 | 1     | RI, MS, Tent |
| 232 | (Z)-3-Octen-1-ol           | 20125-84-2 | 1660 | 1.66 | 836 | 1584 | 1563 | 3     | RI, MS, STD  |
| 233 | (Z)-5-Octen-1-ol           | 64275-73-6 | 1696 | 1.66 | 801 | 1604 | 1608 | 1     | RI, MS, Tent |
| 234 | (E)-2-Octen-1-ol           | 18409-17-1 | 1712 | 1.64 | 903 | 1612 | 1590 | 1,2   | RI, MS, Tent |
| 235 | 2-Octen-1-ol               | 22104-78-5 | 1712 | 1.64 | 891 | 1612 | 1637 | 3     | RI, MS, STD  |
| 236 | 2,6-Dimethyl-5-hepten-1-ol | 4234-93-9  | 1780 | 1.76 | 835 | 1649 | 1654 | 1     | RI, MS, Tent |
| 237 | 1-Nonanol                  | 143-08-8   | 1788 | 1.84 | 939 | 1654 | 1662 | 1,2,3 | RI, MS, STD  |
| 238 | 6-Undecanol                | 23708-56-7 | 1812 | 2.16 | 846 | 1667 | 1640 | 1     | RI, MS, Tent |
| 239 | Undecan-4-ol               | 4272-6-4   | 1820 | 2.16 | 908 | 1672 | 1672 | 1     | RI, MS, Tent |
| 240 | (Z)-3-Nonen-1-ol           | 10340-23-5 | 1844 | 1.84 | 877 | 1684 | 1682 | 2,3   | RI, MS, Tent |
| 241 | (E)-2-Nonen-1-ol           | 31502-14-4 | 1896 | 1.75 | 908 | 1713 | 1715 | 1,3   | RI, MS, Tent |
| 242 | 2-Undecanol                | 1653-30-1  | 1900 | 2.02 | 963 | 1715 | 1738 | 1,3   | RI, MS, Tent |
| 243 | cis-6-Nonen-1-ol           | 35854-86-5 | 1900 | 1.77 | 872 | 1715 | 1714 | 1,3   | RI, MS, Tent |
| 244 | 1-Decanol                  | 112-30-1   | 1984 | 1.83 | 933 | 1761 | 1771 | 1,2,3 | RI, MS, STD  |
| 245 | 1-Methyl-1-phenylethanol   | 617-94-7   | 1988 | 1.66 | 877 | 1763 | 1776 | 2,3   | RI, MS, Tent |
| 246 | (Z)-4-Decen-1-ol           | 57074-37-0 | 2036 | 1.77 | 950 | 1789 | 1784 | 1     | RI, MS, Tent |
| 247 | (Z)-3-Decen-1-ol           | 10340-22-4 | 2052 | 1.74 | 852 | 1798 | 1783 | 3     | RI, MS, Tent |

---

|              |                                   |            |      |      |     |      |      |       |              |
|--------------|-----------------------------------|------------|------|------|-----|------|------|-------|--------------|
| 248          | $\alpha$ -Phenylethyl alcohol     | 98-85-1    | 2084 | 1.55 | 949 | 1819 | 1820 | 2,3   | RI, MS, Tent |
| 249          | 2-Decen-1-ol                      | 22104-80-9 | 2088 | 1.71 | 906 | 1821 | 1812 | 1     | RI, MS, Tent |
| 250          | p-Cymen-8-ol                      | 1197-01-9  | 2144 | 1.67 | 816 | 1858 | 1844 | 1,2,3 | RI, MS, Tent |
| 251          | 1-Undecanol                       | 112-42-5   | 2148 | 1.8  | 868 | 1861 | 1850 | 1     | RI, MS, Tent |
| 252          | Benzenemethanol                   | 100-51-6   | 2188 | 1.47 | 942 | 1887 | 1895 | 1,2,3 | RI, MS, STD  |
| 253          | $\alpha$ -Ethylbenzyl alcohol     | 93-54-9    | 2188 | 1.59 | 803 | 1887 | 1908 | 3     | RI, MS, Tent |
| 254          | trans-2-Undecen-1-ol              | 75039-84-8 | 2232 | 1.72 | 909 | 1917 | 1899 | 1     | RI, MS, Tent |
| 255          | Phenylethyl Alcohol               | 1960-12-8  | 2240 | 1.55 | 955 | 1923 | 1931 | 1,2,3 | RI, MS, STD  |
| 256          | 6,10-Dimethyl-5,9-undecadien-2-ol | 53837-34-6 | 2280 | 1.85 | 718 | 1952 | 1954 | 1     | RI, MS, Tent |
| 257          | 1-Dodecanol                       | 112-53-8   | 2296 | 1.8  | 917 | 1964 | 1935 | 1     | RI, MS, STD  |
| 258          | Diethylene glycol                 | 111-46-6   | 2320 | 1.35 | 927 | 1981 | 1989 | 1,2,3 | RI, MS, Tent |
| 259          | Benzenepropanol                   | 122-97-4   | 2412 | 1.53 | 826 | 2056 | 2061 | 2     | RI, MS, Tent |
| 260          | 1-Hexadecanol                     | 36653-82-4 | 2716 | 2.13 | 907 | 2370 | 2377 | 1     | RI, MS, Tent |
| <b>Acids</b> |                                   |            |      |      |     |      |      |       |              |
| 261          | Acetic acid                       | 64-19-7    | 1416 | 1.28 | 969 | 1453 | 1465 | 1,2,3 | RI, MS, STD  |
| 262          | Formic acid                       | 64-18-6    | 1548 | 1.23 | 962 | 1522 | 1510 | 1,2,3 | RI, MS, STD  |
| 263          | Propanoic acid                    | 1979-9-4   | 1580 | 1.3  | 969 | 1540 | 1535 | 1,2,3 | RI, MS, STD  |
| 264          | 2-Methyl-propanoic acid           | 79-31-2    | 1628 | 1.33 | 935 | 1566 | 1574 | 1,2,3 | RI, MS, STD  |
| 265          | Butanoic acid                     | 107-92-6   | 1736 | 1.36 | 941 | 1625 | 1628 | 1,2,3 | RI, MS, STD  |
| 266          | 2-Methyl butyric acid             | 116-53-0   | 1812 | 1.39 | 839 | 1667 | 1664 | 2     | RI, MS, STD  |
| 267          | Pentanoic acid                    | 109-52-4   | 1940 | 1.39 | 953 | 1737 | 1733 | 1,2,3 | RI, MS, STD  |

|                                |                            |            |      |      |     |      |      |       |              |
|--------------------------------|----------------------------|------------|------|------|-----|------|------|-------|--------------|
| 268                            | 2-Methyl-pentanoic acid    | 97-61-0    | 1992 | 1.35 | 931 | 1765 | 1775 | 1,2,3 | RI, MS, STD  |
| 269                            | 4-Methyl-pentanoic acid    | 646-07-1   | 2056 | 1.34 | 829 | 1800 | 1800 | 1,2,3 | RI, MS, STD  |
| 270                            | Hexanoic acid              | 142-62-1   | 2132 | 1.38 | 861 | 1850 | 1857 | 1,2,3 | RI, MS, STD  |
| 271                            | 5-Methyl-hexanoic acid     | 628-46-6   | 2216 | 1.36 | 925 | 1905 | 1914 | 2,3   | RI, MS, STD  |
| 272                            | 2-Ethyl-hexanoic acid      | 149-57-5   | 2272 | 1.38 | 925 | 1946 | 1950 | 1,2,3 | RI, MS, STD  |
| 273                            | Heptanoic acid             | 111-14-8   | 2280 | 1.39 | 943 | 1952 | 1960 | 1,2,3 | RI, MS, STD  |
| 274                            | (E)-2-Hexenoic acid        | 13419-69-7 | 2304 | 1.33 | 907 | 1969 | 1967 | 1     | RI, MS, STD  |
| 275                            | Octanoic acid              | 124-07-2   | 2416 | 1.38 | 953 | 2060 | 2070 | 1,2,3 | RI, MS, STD  |
| 276                            | (E,E)-2,4-Hexadienoic acid | 110-44-1   | 2516 | 1.3  | 889 | 2155 | 2150 | 1     | RI, MS, Tent |
| 277                            | Nonanoic acid              | 112-05-0   | 2524 | 1.36 | 862 | 2163 | 2169 | 1,2,3 | RI, MS, STD  |
| 278                            | Decanoic acid              | 334-48-5   | 2620 | 1.44 | 910 | 2267 | 2279 | 1,2,3 | RI, MS, STD  |
| 279                            | Benzoic acid               | 65-85-0    | 2800 | 1.4  | 922 | 2451 | 2446 | 1,2,3 | RI, MS, STD  |
| 280                            | Benzeneacetic acid         | 103-82-2   | 2940 | 1.47 | 919 | 2574 | 2565 | 1,3   | RI, MS, STD  |
| 281                            | Tetradecanoic acid         | 544-63-8   | 3104 | 1.89 | 865 | 2688 | 2716 | 1,2,3 | RI, MS, STD  |
| 282                            | Hexadecanoic acid          | 1957-10-3  | 3544 | 2.43 | 892 | 2929 | 2913 | 3     | RI, MS, STD  |
| 283                            | 9-Hexadecenoic acid        | 2091-29-4  | 3648 | 2.45 | 859 | 2986 | 2957 | 3     | RI, MS, Tent |
| <b>Aldehydes &amp; ketones</b> |                            |            |      |      |     |      |      |       |              |
| 284                            | Acetaldehyde               | 75-07-0    | 300  | 1.35 | 959 | 709  | 718  | 1,3   | RI, MS, STD  |
| 285                            | Propanal                   | 123-38-6   | 336  | 1.42 | 959 | 800  | 810  | 1     | RI, MS, STD  |
| 286                            | 2-Propanone                | 67-64-1    | 348  | 1.42 | 936 | 816  | 813  | 1     | RI, MS, Tent |
| 287                            | 2-Methyl-propanal          | 78-84-2    | 348  | 1.49 | 949 | 817  | 842  | 1     | RI, MS, Tent |

|     |                                |           |     |      |     |      |      |       |              |
|-----|--------------------------------|-----------|-----|------|-----|------|------|-------|--------------|
| 288 | 2-Propenal                     | 107-02-8  | 360 | 1.41 | 953 | 832  | 838  | 3     | RI, MS, Tent |
| 289 | Butanal                        | 123-72-8  | 392 | 1.54 | 943 | 875  | 854  | 1     | RI, MS, STD  |
| 290 | 1,1-Diethoxy-ethane            | 105-57-7  | 404 | 1.88 | 898 | 891  | 910  | 1,3   | RI, MS, STD  |
| 291 | 3-Methyl-butanal               | 590-86-3  | 432 | 1.69 | 936 | 917  | 916  | 1,3   | RI, MS, STD  |
| 292 | 3-Buten-2-one                  | 78-94-4   | 468 | 1.52 | 960 | 946  | 948  | 3     | RI, MS, Tent |
| 293 | 2,4,5-Trimethyl-1,3-dioxolane  | 3299-32-9 | 480 | 1.78 | 883 | 956  | 967  | 1,3   | RI, MS, Tent |
| 294 | 1,1-Diethoxy-propane           | 4744-8-5  | 488 | 2.15 | 900 | 963  | 950  | 1,3   | RI, MS, STD  |
| 295 | 2,3-Butanedione                | 431-03-8  | 508 | 1.49 | 983 | 979  | 977  | 3     | RI, MS, STD  |
| 296 | 1,1-Diethoxy-2-methyl-propane  | 1741-41-9 | 512 | 2.3  | 838 | 983  | 969  | 1,2,3 | RI, MS, STD  |
| 297 | 2-Pentanone                    | 107-87-9  | 516 | 1.72 | 929 | 985  | 1003 | 1,2   | RI, MS, STD  |
| 298 | Pentanal                       | 110-62-3  | 516 | 1.74 | 819 | 985  | 979  | 1,2   | RI, MS, STD  |
| 299 | 2-Methyl-1-buten-3-one         | 814-78-8  | 548 | 1.63 | 958 | 1008 | 1006 | 2,3   | RI, MS, Tent |
| 300 | 4-Methyl-2-pentanone           | 108-10-1  | 564 | 1.78 | 915 | 1017 | 1039 | 2     | RI, MS, Tent |
| 301 | 1,1-Diethoxy-butane            | 3658-95-5 | 616 | 2.43 | 871 | 1048 | 1031 | 2     | RI, MS, Tent |
| 302 | 2-Butenal                      | 4170-30-3 | 632 | 1.56 | 918 | 1056 | 1042 | 2,3   | RI, MS, Tent |
| 303 | 1,1-Diethoxy-3-methyl-butane   | 3842-3-3  | 664 | 2.58 | 913 | 1075 | 1062 | 1,2,3 | RI, MS, Tent |
| 304 | 2-Hexanone                     | 591-78-6  | 688 | 1.83 | 906 | 1089 | 1098 | 2     | RI, MS, STD  |
| 305 | 2,4,6-Trimethyl-1,3,5-trioxane | 123-63-7  | 700 | 1.73 | 896 | 1095 | 1070 | 2,3   | RI, MS, Tent |
| 306 | Hexanal                        | 66-25-1   | 700 | 1.9  | 924 | 1095 | 1114 | 1,2,3 | RI, MS, STD  |
| 307 | 2-Methyl-2-butenal             | 1115-11-3 | 712 | 1.76 | 829 | 1102 | 1076 | 1,2   | RI, MS, Tent |
| 308 | E-2-Methyl-2-butenal           | 497-03-0  | 716 | 1.75 | 826 | 1104 | 1088 | 3     | RI, MS, Tent |

|     |                           |            |      |      |     |      |      |       |              |
|-----|---------------------------|------------|------|------|-----|------|------|-------|--------------|
| 309 | 4-Heptanone               | 123-19-3   | 764  | 2.12 | 861 | 1128 | 1118 | 2     | RI, MS, Tent |
| 310 | (E)-3-Penten-2-one        | 3102-33-8  | 784  | 1.69 | 884 | 1138 | 1121 | 2     | RI, MS, Tent |
| 311 | 4-Methyl-3-penten-2-one   | 141-79-7   | 788  | 1.84 | 920 | 1140 | 1131 | 2     | RI, MS, Tent |
| 312 | 5-Methyl-2-hexanone       | 110-12-3   | 800  | 1.97 | 915 | 1147 | 1155 | 2     | RI, MS, Tent |
| 313 | 2-Methyl-2-pentenal       | 623-36-9   | 820  | 1.89 | 868 | 1157 | 1155 | 2     | RI, MS, Tent |
| 314 | Acetyl valeryl            | 1996-4-8   | 832  | 1.86 | 933 | 1163 | 1153 | 1,2,3 | RI, MS, Tent |
| 315 | Heptanal                  | 111-71-7   | 884  | 2.09 | 828 | 1189 | 1178 | 1,2,3 | RI, MS, STD  |
| 316 | 2-Heptanone               | 110-43-0   | 904  | 2    | 812 | 1199 | 1213 | 1,2,3 | RI, MS, STD  |
| 317 | Cyclopentanone            | 120-92-3   | 904  | 1.86 | 894 | 1199 | 1200 | 1,2,3 | RI, MS, STD  |
| 318 | 3-Ethoxy-propanal         | 2806-85-1  | 908  | 1.71 | 839 | 1201 | 1185 | 1     | RI, MS, Tent |
| 319 | 2-Methyl-cyclopentanone   | 1120-72-5  | 912  | 1.99 | 854 | 1203 | 1220 | 2     | RI, MS, Tent |
| 320 | 1,1-Diethoxy-hexane       | 3658-93-3  | 1004 | 2.81 | 873 | 1248 | 1230 | 2,3   | RI, MS, STD  |
| 321 | 1-(1-Ethoxyethoxy)-hexane | 54484-73-0 | 1084 | 2.6  | 836 | 1286 | 1258 | 1,2   | RI, MS, STD  |
| 322 | 3-Hydroxy-2-butanone      | 513-86-0   | 1108 | 1.44 | 950 | 1297 | 1277 | 1,3   | RI, MS, STD  |
| 323 | 1,1,3-Triethoxy-dutane    | 5870-82-6  | 1112 | 2.55 | 915 | 1300 | 1310 | 2     | RI, MS, Tent |
| 324 | Cyclohexanone             | 108-94-1   | 1116 | 2.04 | 875 | 1301 | 1311 | 2     | RI, MS, STD  |
| 325 | 1,1,3-Triethoxy-propane   | 7789-92-6  | 1124 | 2.46 | 933 | 1306 | 1299 | 2,3   | RI, MS, Tent |
| 326 | 2-Octanone                | 111-13-7   | 1128 | 2.1  | 918 | 1307 | 1309 | 1,2,3 | RI, MS, STD  |
| 327 | Octanal                   | 124-13-0   | 1132 | 2.16 | 886 | 1310 | 1319 | 1,2,3 | RI, MS, STD  |
| 328 | 4-Nonanone                | 4485-09-0  | 1176 | 2.39 | 866 | 1332 | 1356 | 2     | RI, MS, Tent |
| 329 | 1,1-Diethoxy-heptane      | 688-82-4   | 1176 | 2.88 | 810 | 1332 | 1332 | 2     | RI, MS, Tent |



|     |                                |            |      |      |     |      |      |       |              |
|-----|--------------------------------|------------|------|------|-----|------|------|-------|--------------|
| 330 | (E)-2-Heptenal                 | 18829-55-5 | 1180 | 1.96 | 901 | 1333 | 1314 | 2     | RI, MS, STD  |
| 331 | 2,2,6-Trimethyl-cyclohexanone  | 2408-37-9  | 1196 | 2.39 | 884 | 1341 | 1333 | 3     | RI, MS, Tent |
| 332 | Ethyl orthoformate             | 122-51-0   | 1200 | 2.89 | 801 | 1344 | 1347 | 1     | RI, MS, Tent |
| 333 | (Z)-2-Heptenal                 | 57266-86-1 | 1204 | 1.94 | 901 | 1345 | 1339 | 1,3   | RI, MS, STD  |
| 334 | 2-Ethyl-2-hexenal              | 645-62-5   | 1224 | 2.12 | 829 | 1355 | 1330 | 3     | RI, MS, Tent |
| 335 | 6-Methyl-5-heptene-2-one       | 110-93-0   | 1228 | 2.04 | 875 | 1357 | 1342 | 1,2,3 | RI, MS, Tent |
| 336 | 2-Nonanone                     | 821-55-6   | 1240 | 2.21 | 806 | 1363 | 1367 | 1,2   | RI, MS, STD  |
| 337 | 2-Cyclopenten-1-one            | 930-30-3   | 1256 | 1.72 | 948 | 1371 | 1383 | 2,3   | RI, MS, Tent |
| 338 | 2-Isopropyl-5-methyl-2-hexenal | 35158-25-9 | 1268 | 2.35 | 877 | 1377 | 1378 | 1,3   | RI, MS, Tent |
| 339 | 2-Methyl-2-cyclopenten-1-one   | 1120-73-6  | 1276 | 1.87 | 911 | 1381 | 1395 | 2,3   | RI, MS, Tent |
| 340 | Nonanal                        | 124-19-6   | 1320 | 2.29 | 968 | 1403 | 1422 | 1,2,3 | RI, MS, STD  |
| 341 | 3-Octen-2-one                  | 1669-44-9  | 1352 | 2.05 | 877 | 1420 | 1408 | 1,3   | RI, MS, Tent |
| 342 | 1,1-Diethoxy-octane            | 54889-48-4 | 1376 | 2.93 | 822 | 1433 | 1431 | 1     | RI, MS, Tent |
| 343 | 2-Octenal                      | 2363-89-5  | 1396 | 2.06 | 964 | 1443 | 1445 | 1,2   | RI, MS, STD  |
| 344 | (E)-2-Octenal                  | 2548-87-0  | 1396 | 2.05 | 921 | 1443 | 1433 | 3     | RI, MS, STD  |
| 345 | 2-Nonen-4-one                  | 32064-72-5 | 1488 | 2.18 | 839 | 1491 | 1470 | 1     | RI, MS, Tent |
| 346 | 2-Decanone                     | 693-54-9   | 1508 | 2.32 | 948 | 1501 | 1480 | 1,2   | RI, MS, STD  |
| 347 | Decanal                        | 112-31-2   | 1516 | 2.37 | 921 | 1506 | 1506 | 1,2,3 | RI, MS, STD  |
| 348 | 3-Nonen-2-one                  | 14309-57-0 | 1544 | 2.13 | 862 | 1521 | 1520 | 1,2,3 | RI, MS, Tent |
| 349 | 1,1-Diethoxy-nonane            | 54815-13-3 | 1556 | 3.02 | 857 | 1528 | 1522 | 1,2,3 | RI, MS, Tent |
| 350 | 6-Undecanone                   | 927-49-1   | 1568 | 2.56 | 866 | 1534 | 1527 | 1     | RI, MS, Tent |

|     |                                   |            |      |      |     |      |      |       |              |
|-----|-----------------------------------|------------|------|------|-----|------|------|-------|--------------|
| 351 | Benzaldehyde                      | 100-52-7   | 1596 | 1.75 | 810 | 1549 | 1568 | 1,2,3 | RI, MS, STD  |
| 352 | 2,3-Dimethyl-2-cyclopentenone     | 1121-05-7  | 1608 | 1.98 | 824 | 1556 | 1535 | 2     | RI, MS, Tent |
| 353 | 3-Undecanone                      | 2216-87-7  | 1636 | 2.5  | 795 | 1571 | 1586 | 1     | RI, MS, Tent |
| 354 | 3,5-(E, E)-Octadien-2-one         | 30086-02-3 | 1656 | 1.91 | 815 | 1582 | 1569 | 1     | RI, MS, Tent |
| 355 | (E, Z)-2,6-Nonadienal             | 557-48-2   | 1684 | 2.03 | 904 | 1597 | 1591 | 1,3   | RI, MS, STD  |
| 356 | 2-Undecanone                      | 112-12-9   | 1696 | 2.4  | 953 | 1604 | 1592 | 1,2,3 | RI, MS, STD  |
| 357 | (3E)-6-Methyl-3,5-heptadien-2-one | 16647-04-4 | 1700 | 1.91 | 873 | 1606 | 1582 | 3     | RI, MS, Tent |
| 358 | Undecanal                         | 112-44-7   | 1708 | 2.45 | 868 | 1611 | 1609 | 1     | RI, MS, Tent |
| 359 | 1,1-Diethoxydecane                | 34764-02-8 | 1732 | 3.09 | 823 | 1624 | 1622 | 1,2   | RI, MS, Tent |
| 360 | 2-Methyl-Benzaldehyde             | 529-20-4   | 1756 | 1.93 | 846 | 1636 | 1622 | 3     | RI, MS, Tent |
| 361 | 3-Methyl-Benzaldehyde             | 620-23-5   | 1756 | 1.94 | 867 | 1636 | 1624 | 1,2,3 | RI, MS, STD  |
| 362 | 4-Methyl-Benzaldehyde             | 104-87-0   | 1764 | 1.92 | 918 | 1641 | 1654 | 1,2   | RI, MS, Tent |
| 363 | (E)-2-Decenal                     | 3913-81-3  | 1780 | 2.31 | 836 | 1650 | 1630 | 2     | RI, MS, STD  |
| 364 | (Z)-2-Decenal                     | 2497-25-8  | 1784 | 2.31 | 928 | 1652 | 1630 | 1,3   | RI, MS, Tent |
| 365 | Phenylethanal                     | 122-78-1   | 1796 | 1.88 | 945 | 1658 | 1650 | 1,2,3 | RI, MS, STD  |
| 366 | Acetophenone                      | 98-86-2    | 1812 | 1.97 | 953 | 1667 | 1655 | 1,2,3 | RI, MS, STD  |
| 367 | Cryptone                          | 500-02-7   | 1848 | 2.36 | 815 | 1687 | 1668 | 3     | RI, MS, Tent |
| 368 | 6,10-Dimethyl-2-undecanone        | 1604-34-8  | 1852 | 2.84 | 849 | 1689 | 1663 | 1     | RI, MS, Tent |
| 369 | Carvotanacetone                   | 499-71-8   | 1860 | 2.52 | 927 | 1694 | 1697 | 1,2,3 | RI, MS, STD  |
| 370 | 2-Hydroxy-benzaldehyde            | 1990-2-8   | 1864 | 1.82 | 840 | 1695 | 1699 | 1,2,3 | RI, MS, STD  |
| 371 | (E, E)-2,4-Nonadienal             | 5910-87-2  | 1896 | 2.05 | 941 | 1713 | 1686 | 1,2,3 | RI, MS, STD  |

|     |                                   |            |      |      |     |      |      |       |              |
|-----|-----------------------------------|------------|------|------|-----|------|------|-------|--------------|
| 372 | Dodecanal                         | 112-54-9   | 1900 | 2.64 | 944 | 1715 | 1709 | 1     | RI, MS, Tent |
| 373 | (2,2-Diethoxyethyl)-benzene       | 6314-97-2  | 1916 | 2.47 | 880 | 1724 | 1711 | 1,2,3 | RI, MS, Tent |
| 374 | 4-Ethyl-benzaldehyde              | 4748-78-1  | 1920 | 2.05 | 876 | 1726 | 1730 | 1,3   | RI, MS, Tent |
| 375 | p-Menth-1-en-7-al                 | 21391-98-0 | 1944 | 2.37 | 842 | 1739 | 1710 | 1     | RI, MS, Tent |
| 376 | 1-Phenyl-1-propanone              | 93-55-0    | 1948 | 2    | 911 | 1741 | 1734 | 1,2,3 | RI, MS, Tent |
| 377 | p-Menth-1-en-3-one                | 89-81-6    | 1952 | 2.26 | 893 | 1744 | 1730 | 1,3   | RI, MS, Tent |
| 378 | 4-(1-Methylethyl)-benzaldehyde    | 122-03-2   | 1980 | 2.05 | 864 | 1759 | 1785 | 1,2   | RI, MS, Tent |
| 379 | 1-(4-Methylphenyl)-ethanone       | 122-00-9   | 2040 | 1.91 | 891 | 1792 | 1794 | 2     | RI, MS, Tent |
| 380 | 1-Phenyl-1-butanone               | 495-40-9   | 2072 | 2    | 945 | 1811 | 1793 | 1,2,3 | RI, MS, Tent |
| 381 | 4-Phenyl-2-butanone               | 2550-26-7  | 2172 | 1.85 | 842 | 1876 | 1851 | 1,2,3 | RI, MS, STD  |
| 382 | 5-(2-Propenyl)-1,3-benzodioxole   | 94-59-7    | 2196 | 1.89 | 928 | 1892 | 1874 | 2,3   | RI, MS, Tent |
| 383 | 4-Hydroxy-2-methylacetophenone    | 875-59-2   | 2272 | 1.8  | 834 | 1946 | 1942 | 3     | RI, MS, Tent |
| 384 | 2-Phenyl-2-butenal                | 4411-89-6  | 2280 | 1.81 | 867 | 1952 | 1933 | 1,2,3 | RI, MS, STD  |
| 385 | 4-Methyl-2-phenyl-2-pentenal      | 26643-91-4 | 2284 | 1.91 | 863 | 1955 | 1932 | 1,3   | RI, MS, Tent |
| 386 | Maltol                            | 118-71-8   | 2328 | 1.51 | 861 | 1987 | 1968 | 3     | RI, MS, Tent |
| 387 | 2-Pentadecanone                   | 2345-28-0  | 2372 | 2.17 | 915 | 2023 | 2028 | 1     | RI, MS, Tent |
| 388 | 5-Methyl-2-phenyl-2-hexenal       | 21834-92-4 | 2396 | 1.85 | 790 | 2043 | 2052 | 1,3   | RI, MS, Tent |
| 389 | 6,10,14-Trimethyl-2-pentadecanone | 502-69-2   | 2488 | 2.04 | 826 | 2127 | 2110 | 2,3   | RI, MS, Tent |
| 390 | 1-(4-Methoxyphenyl)-ethanone      | 100-06-1   | 2532 | 1.61 | 878 | 2172 | 2144 | 1,3   | RI, MS, Tent |
| 391 | 1-(3-Methoxyphenyl)-ethanone      | 586-37-8   | 2532 | 1.61 | 928 | 2172 | 2148 | 2     | RI, MS, Tent |
| 392 | 1-(4-Methoxyphenyl)-2-propanone   | 122-84-9   | 2540 | 1.63 | 894 | 2180 | 2170 | 1,3   | RI, MS, Tent |

|               |                                           |            |      |      |     |      |      |       |              |
|---------------|-------------------------------------------|------------|------|------|-----|------|------|-------|--------------|
| 393           | 4-Methoxy-6-(2-propenyl)-1,3-benzodioxole | 607-91-0   | 2636 | 1.84 | 807 | 2286 | 2257 | 2     | RI, MS, Tent |
| 394           | 1-(2-Hydroxy-4-methoxyphenyl)-ethanone    | 552-41-0   | 2656 | 1.77 | 862 | 2307 | 2300 | 1,2,3 | RI, MS, Tent |
| <b>Furans</b> |                                           |            |      |      |     |      |      |       |              |
| 395           | Furan                                     | 110-00-9   | 336  | 1.39 | 863 | 800  | 798  | 1     | RI, MS, STD  |
| 396           | 2-Methyl-furan                            | 534-22-5   | 388  | 1.51 | 939 | 870  | 875  | 1,3   | RI, MS, STD  |
| 397           | 2-Ethyl-furan                             | 3208-16-0  | 480  | 1.7  | 748 | 956  | 960  | 1     | RI, MS, Tent |
| 398           | Dihydro-2-methyl-3(2H)-furanone           | 3188-00-9  | 1060 | 1.71 | 830 | 1274 | 1270 | 2     | RI, MS, STD  |
| 399           | 3-Furaldehyde                             | 498-60-2   | 1388 | 1.51 | 936 | 1438 | 1438 | 2,3   | RI, MS, STD  |
| 400           | 2-Furaldehyde diethyl acetal              | 13529-27-6 | 1452 | 2.02 | 909 | 1472 | 1456 | 1     | RI, MS, STD  |
| 401           | 2-Furancarboxaldehyde                     | 1998-1-1   | 1464 | 1.57 | 967 | 1478 | 1486 | 1,2,3 | RI, MS, STD  |
| 402           | Benzofuran                                | 271-89-6   | 1536 | 1.85 | 872 | 1516 | 1496 | 2,3   | RI, MS, Tent |
| 403           | 1-(2-Furanyl)-ethanone                    | 1192-62-7  | 1544 | 1.63 | 941 | 1521 | 1498 | 1,2,3 | RI, MS, STD  |
| 404           | Tetrahydro-2-furanmethanol                | 97-99-4    | 1548 | 1.9  | 733 | 1523 | 1501 | 1     | RI, MS, Tent |
| 405           | 1-(2-Furanyl)-1-propanone                 | 3194-15-8  | 1668 | 1.76 | 901 | 1588 | 1565 | 2,3   | RI, MS, Tent |
| 406           | 5-Methyl-furfural                         | 620-02-0   | 1668 | 1.69 | 938 | 1588 | 1582 | 1,2,3 | RI, MS, STD  |
| 407           | Furfuryl propionate                       | 623-19-8   | 1696 | 1.85 | 802 | 1604 | 1603 | 3     | RI, MS, STD  |
| 408           | 2-Methyl-benzofuran                       | 4265-25-2  | 1708 | 2.02 | 905 | 1610 | 1589 | 1     | RI, MS, Tent |
| 409           | 2-Furfurylfuran                           | 1197-40-6  | 1724 | 1.84 | 883 | 1619 | 1615 | 1,3   | RI, MS, STD  |
| 410           | 2-Acetyl-5-methylfuran                    | 1193-79-9  | 1744 | 1.79 | 945 | 1630 | 1608 | 1,2   | RI, MS, STD  |
| 411           | Ethyl 2-furoate                           | 614-99-3   | 1748 | 1.79 | 937 | 1632 | 1621 | 1,2,3 | RI, MS, STD  |
| 412           | 5-Ethyl-2-furaldehyde                     | 23074-10-4 | 1784 | 1.86 | 763 | 1652 | 1645 | 1,2,3 | RI, MS, STD  |

|                           |                           |            |      |      |     |      |      |       |              |
|---------------------------|---------------------------|------------|------|------|-----|------|------|-------|--------------|
| 413                       | 2-Furanmethanol           | 98-00-0    | 1804 | 1.42 | 954 | 1662 | 1666 | 1,3   | RI, MS, STD  |
| 414                       | 2-Butanoylfuran           | 4208-57-5  | 1808 | 1.96 | 733 | 1665 | 1644 | 2,3   | RI, MS, Tent |
| 415                       | Furfuryl butyrate         | 623-21-2   | 1824 | 2.11 | 915 | 1674 | 1649 | 1,2,3 | RI, MS, STD  |
| 416                       | 2-Furfuryl-5-methylfuran  | 13678-51-8 | 1844 | 2.18 | 849 | 1685 | 1703 | 1     | RI, MS, Tent |
| 417                       | 5-Methyl-2-propionylfuran | 10599-69-6 | 1860 | 2.03 | 841 | 1693 | 1686 | 2,3   | RI, MS, Tent |
| 418                       | Propyl 2-furoate          | 615-10-1   | 1900 | 1.93 | 847 | 1715 | 1696 | 1,2,3 | RI, MS, Tent |
| 419                       | Furfuryl pentanoate       | 36701-01-6 | 2008 | 2.03 | 834 | 1774 | 1753 | 1,2,3 | RI, MS, STD  |
| 420                       | Furfuryl hexanoate        | 39252-02-3 | 2168 | 1.98 | 914 | 1874 | 1857 | 1,2,3 | RI, MS, STD  |
| 421                       | 2-Hexanoylfuran           | 14360-50-0 | 2184 | 1.85 | 840 | 1884 | 1872 | 3     | RI, MS, Tent |
| 422                       | Dibenzofuran              | 132-64-9   | 2656 | 1.96 | 909 | 2307 | 2308 | 1,2,3 | RI, MS, Tent |
| 423                       | 5-Hydroxymethylfurfural   | 67-47-0    | 2884 | 1.5  | 834 | 2527 | 2528 | 2,3   | RI, MS, STD  |
| <b>Nitrogen compounds</b> |                           |            |      |      |     |      |      |       |              |
| 424                       | Pyridine                  | 110-86-1   | 900  | 1.68 | 839 | 1197 | 1193 | 2,3   | RI, MS, Tent |
| 425                       | Trimethyl-oxazole         | 20662-84-4 | 916  | 1.88 | 860 | 1205 | 1206 | 2     | RI, MS, Tent |
| 426                       | Pyrazine                  | 290-37-9   | 948  | 1.62 | 712 | 1220 | 1219 | 3     | RI, MS, STD  |
| 427                       | 2-Methyl pyrazine         | 109-08-0   | 1064 | 1.77 | 837 | 1276 | 1271 | 2     | RI, MS, STD  |
| 428                       | 2,5-Dimethyl-pyrazine     | 123-32-0   | 1176 | 1.92 | 714 | 1331 | 1333 | 2,3   | RI, MS, STD  |
| 429                       | 2,6-Dimethyl-pyrazine     | 108-50-9   | 1184 | 1.94 | 881 | 1335 | 1308 | 2     | RI, MS, STD  |
| 430                       | Ethyl-pyrazine            | 13925-00-3 | 1196 | 1.91 | 885 | 1341 | 1344 | 2     | RI, MS, STD  |
| 431                       | 2,3-Dimethyl-pyrazine     | 5910-89-4  | 1224 | 1.98 | 863 | 1355 | 1377 | 2,3   | RI, MS, STD  |
| 432                       | Isopropylpyrazine         | 9820-90-0  | 1232 | 2.04 | 762 | 1359 | 1385 | 2,3   | RI, MS, Tent |

|     |                                  |            |      |      |     |      |      |       |              |
|-----|----------------------------------|------------|------|------|-----|------|------|-------|--------------|
| 433 | 2-Ethyl-6-methyl-pyrazine        | 13925-03-6 | 1296 | 2.12 | 899 | 1391 | 1395 | 2,3   | RI, MS, STD  |
| 434 | 2-Methyl-3-isopropylpyrazine     | 15986-81-9 | 1304 | 2.25 | 746 | 1395 | 1387 | 2     | RI, MS, Tent |
| 435 | 2-Ethyl-5-methyl-pyrazine        | 13360-64-0 | 1308 | 2.1  | 745 | 1397 | 1402 | 2     | RI, MS, STD  |
| 436 | Trimethyl-pyrazine               | 14667-55-1 | 1344 | 2.07 | 858 | 1416 | 1421 | 1,2,3 | RI, MS, STD  |
| 437 | 2,6-Diethyl-pyrazine             | 13067-27-1 | 1396 | 2.29 | 741 | 1443 | 1415 | 3     | RI, MS, STD  |
| 438 | 3-Ethyl-2,5-dimethyl-pyrazine    | 13360-65-1 | 1420 | 2.26 | 757 | 1455 | 1441 | 1,2,3 | RI, MS, STD  |
| 439 | 2,3-Dimethyl-5-ethylpyrazine     | 15707-34-3 | 1444 | 2.25 | 898 | 1468 | 1460 | 2,3   | RI, MS, STD  |
| 440 | Tetramethyl-pyrazine             | 1124-11-4  | 1476 | 2.21 | 947 | 1484 | 1462 | 1,2,3 | RI, MS, STD  |
| 441 | 3,5-Diethyl-2-methyl-pyrazine    | 18138-05-1 | 1508 | 2.41 | 742 | 1501 | 1503 | 3     | RI, MS, STD  |
| 442 | 2,3,5-Trimethyl-6-ethylpyrazine  | 17398-16-2 | 1544 | 2.39 | 887 | 1521 | 1491 | 3     | RI, MS, STD  |
| 443 | 1H-Pyrrole                       | 109-97-7   | 1548 | 1.35 | 737 | 1523 | 1513 | 1,2,3 | RI, MS, STD  |
| 444 | 2-Methyl-1H-pyrrole              | 636-41-9   | 1624 | 1.42 | 887 | 1564 | 1551 | 3     | RI, MS, Tent |
| 445 | 3-Methyl-1H-pyrrole              | 616-43-3   | 1652 | 1.41 | 863 | 1579 | 1569 | 2,3   | RI, MS, Tent |
| 446 | 2-Pentyl-Pyridine                | 2294-76-0  | 1676 | 2.28 | 733 | 1593 | 1572 | 2     | RI, MS, Tent |
| 447 | 2-Formyl-1-methylpyrrole         | 1192-58-1  | 1756 | 1.79 | 838 | 1636 | 1626 | 2     | RI, MS, Tent |
| 448 | 2-Acetyl-6-methylpyridine        | 6940-57-4  | 1764 | 2    | 713 | 1641 | 1614 | 2     | RI, MS, Tent |
| 449 | 2,3-Dimethyl-5-isopentylpyrazine | 18450-01-6 | 1812 | 2.73 | 717 | 1667 | 1680 | 3     | RI, MS, Tent |
| 450 | Quinoline                        | 91-22-5    | 2296 | 1.82 | 759 | 1964 | 1942 | 2     | RI, MS, Tent |
| 451 | 2-Acetylpyrrole                  | 1072-83-9  | 2328 | 1.45 | 878 | 1987 | 2002 | 1,2,3 | RI, MS, STD  |
| 452 | 2-Formylpyrrole                  | 1003-29-8  | 2400 | 1.37 | 820 | 2046 | 2059 | 1,2   | RI, MS, STD  |

---

**Sulfides**

---

|     |                                   |            |      |      |     |      |      |       |              |
|-----|-----------------------------------|------------|------|------|-----|------|------|-------|--------------|
| 453 | Methanethiol                      | 74-93-1    | 292  | 1.34 | 985 | 669  | 643  | 1,3   | RI, MS, STD  |
| 454 | Dimethyl sulfide                  | 75-18-3    | 316  | 1.43 | 895 | 750  | 774  | 1     | RI, MS, STD  |
| 455 | Methyl thioacetate                | 1534-08-3  | 628  | 1.69 | 814 | 1054 | 1052 | 1,2   | RI, MS, Tent |
| 456 | Dimethyl disulfide                | 624-92-0   | 668  | 1.81 | 960 | 1077 | 1078 | 1,2,3 | RI, MS, STD  |
| 457 | S-Methyl propanethioate           | 5925-75-7  | 752  | 1.95 | 749 | 1122 | 1131 | 1,2,3 | RI, MS, STD  |
| 458 | Methyl ethyl disulfide            | 20333-39-5 | 804  | 2.05 | 736 | 1149 | 1141 | 2     | RI, MS, Tent |
| 459 | S-Methyl ester butanethioic acid  | 2432-51-1  | 908  | 2.13 | 835 | 1201 | 1198 | 1,2,3 | RI, MS, STD  |
| 460 | Thiazole                          | 288-47-1   | 1032 | 1.59 | 907 | 1261 | 1259 | 2,3   | RI, MS, STD  |
| 461 | Dimethyl trisulphide              | 3658-80-8  | 1312 | 2.16 | 966 | 1399 | 1400 | 1,2,3 | RI, MS, STD  |
| 462 | S-Methyl hexanethioate            | 2432-77-1  | 1340 | 2.37 | 895 | 1414 | 1412 | 1,2,3 | RI, MS, Tent |
| 463 | Methyl pentyl disulfide           | 72437-68-4 | 1400 | 2.48 | 764 | 1445 | 1445 | 3     | RI, MS, Tent |
| 464 | 4,5-Dimethyl-2-isopropyl-thiazole | 53498-30-9 | 1424 | 2.47 | 747 | 1457 | 1436 | 3     | RI, MS, Tent |
| 465 | Ethyl 2-(methylthio)acetate       | 4455-13-4  | 1428 | 1.88 | 902 | 1459 | 1484 | 1     | RI, MS, STD  |
| 466 | Methional                         | 3268-49-3  | 1448 | 1.72 | 826 | 1470 | 1480 | 1,2,3 | RI, MS, STD  |
| 467 | 2-Pentyl-thiophene                | 4861-58-9  | 1448 | 2.51 | 893 | 1470 | 1452 | 1,2,3 | RI, MS, Tent |
| 468 | Furfuryl methyl sulfide           | 1438-91-1  | 1504 | 1.87 | 913 | 1499 | 1492 | 1,3   | RI, MS, Tent |
| 469 | 4,5-Dimethyl-2-isobutylthiazole   | 53498-32-1 | 1568 | 2.57 | 709 | 1534 | 1514 | 3     | RI, MS, Tent |
| 470 | 2-(Methylthio)ethanol             | 5271-38-5  | 1576 | 1.5  | 725 | 1538 | 1520 | 1     | RI, MS, Tent |
| 471 | Methyl propyl trisulfide          | 17619-36-2 | 1588 | 2.47 | 752 | 1545 | 1529 | 1     | RI, MS, Tent |
| 472 | Ethyl 3-(methylthio)propionate    | 13327-56-5 | 1644 | 2    | 961 | 1575 | 1580 | 1,2,3 | RI, MS, STD  |
| 473 | 2,5-Dimethyl-1,3,4-trithiolane    | 23654-92-4 | 1724 | 2.32 | 865 | 1619 | 1618 | 1,3   | RI, MS, Tent |

|                |                                  |            |      |      |     |      |      |       |              |
|----------------|----------------------------------|------------|------|------|-----|------|------|-------|--------------|
| 474            | 3-(Methylthio)propyl acetate     | 16630-55-0 | 1760 | 1.99 | 752 | 1639 | 1627 | 1     | RI, MS, Tent |
| 475            | 2,4,5-Trithiahexane              | 42474-44-2 | 1828 | 2.26 | 895 | 1676 | 1662 | 1,2,3 | RI, MS, Tent |
| 476            | Methyl benzyl sulfide            | 766-92-7   | 1836 | 2.36 | 932 | 1680 | 1665 | 1,3   | RI, MS, STD  |
| 477            | 3-Thiophenecarboxaldehyde        | 498-62-4   | 1868 | 1.77 | 711 | 1697 | 1687 | 1,2,3 | RI, MS, Tent |
| 478            | 2-Thiophenecarboxaldehyde        | 1998-3-3   | 1896 | 1.73 | 920 | 1713 | 1722 | 1,2,3 | RI, MS, STD  |
| 479            | Methionol                        | 505-10-2   | 1916 | 1.56 | 914 | 1724 | 1721 | 1,2,3 | RI, MS, STD  |
| 480            | 5-Methyl-2-formylthiophene       | 13679-70-4 | 1932 | 1.9  | 814 | 1733 | 1759 | 1,2,3 | RI, MS, Tent |
| 481            | Dimethyl tetrasulphide           | 5756-24-1  | 1988 | 2.32 | 727 | 1763 | 1750 | 3     | RI, MS, Tent |
| 482            | 1,2,4-Trithiolane                | 289-16-7   | 2004 | 2    | 866 | 1772 | 1760 | 1,3   | RI, MS, Tent |
| 483            | 3-Acetylthiophene                | 1468-83-3  | 2044 | 1.75 | 752 | 1794 | 1772 | 2     | RI, MS, Tent |
| 484            | 2-Acetylthiophen                 | 88-15-3    | 2044 | 1.74 | 717 | 1794 | 1785 | 3     | RI, MS, STD  |
| 485            | Furfuryl methyl disulfide        | 57500-00-2 | 2088 | 1.94 | 846 | 1822 | 1813 | 1,2,3 | RI, MS, Tent |
| 486            | 3-Methyl-2-thiophenecarbaldehyde | 5834-16-2  | 2104 | 1.76 | 798 | 1832 | 1815 | 1,2,3 | RI, MS, Tent |
| 487            | 1-(2-Thienyl) propanone          | 13679-75-9 | 2144 | 1.8  | 714 | 1858 | 1840 | 1     | RI, MS, Tent |
| 488            | Benzothiazole                    | 95-16-9    | 2320 | 1.78 | 835 | 1981 | 1958 | 1,2,3 | RI, MS, STD  |
| 489            | 2-Phenylthiophene                | 825-55-8   | 2476 | 1.76 | 780 | 2114 | 2124 | 1     | RI, MS, STD  |
| <b>Phenols</b> |                                  |            |      |      |     |      |      |       |              |
| 490            | 2-Methoxy phenol                 | 1990-5-1   | 2168 | 1.55 | 954 | 1874 | 1871 | 1,2,3 | RI, MS, STD  |
| 491            | Di-ter-butyl p-cresol            | 128-37-0   | 2232 | 2.24 | 928 | 1918 | 1910 | 1,2,3 | RI, MS, Tent |
| 492            | 2-Methoxy-4-methylphenol         | 93-51-6    | 2304 | 1.57 | 951 | 1969 | 1956 | 1,2,3 | RI, MS, STD  |
| 493            | Phenol                           | 108-95-2   | 2364 | 1.33 | 967 | 2015 | 2030 | 1,2,3 | RI, MS, STD  |



|                 |                            |            |      |      |     |      |      |       |              |
|-----------------|----------------------------|------------|------|------|-----|------|------|-------|--------------|
| 494             | 2-Methylphenol             | 95-48-7    | 2360 | 1.38 | 941 | 2012 | 1996 | 1,2,3 | RI, MS, STD  |
| 495             | 2-Methoxy-4-ethylphenol    | 2785-89-9  | 2400 | 1.56 | 922 | 2046 | 2048 | 1,2,3 | RI, MS, STD  |
| 496             | p-Cresol                   | 106-44-5   | 2456 | 1.34 | 957 | 2094 | 2089 | 1,2,3 | RI, MS, STD  |
| 497             | 2-Methoxy-4-propylphenol   | 2785-87-7  | 2484 | 1.56 | 883 | 2122 | 2139 | 1,2   | RI, MS, STD  |
| 498             | 3-Ethylphenol              | 620-17-7   | 2524 | 1.38 | 731 | 2163 | 2181 | 3     | RI, MS, Tent |
| 499             | 2-tert-Butylphenol         | 88-18-6    | 2532 | 1.43 | 729 | 2172 | 2161 | 3     | RI, MS, Tent |
| 500             | 4-Ethylphenol              | 123-07-9   | 2548 | 1.38 | 930 | 2188 | 2195 | 1,2,3 | RI, MS, STD  |
| 501             | 5-Methyl-2-isopropylphenol | 89-83-8    | 2548 | 1.45 | 844 | 2188 | 2180 | 1,2,3 | RI, MS, Tent |
| 502             | 2-Methoxy-4-vinylphenol    | 7786-61-0  | 2572 | 1.53 | 867 | 2214 | 2213 | 2     | RI, MS, STD  |
| 503             | 2-Methyl-5-isopropylphenol | 499-75-2   | 2576 | 1.47 | 836 | 2219 | 2227 | 1     | RI, MS, Tent |
| 504             | 4-Propylphenol             | 645-56-7   | 2628 | 1.45 | 737 | 2276 | 2270 | 1,2,3 | RI, MS, Tent |
| 505             | 2,6-Dimethoxyphenol        | 1991-10-1  | 2636 | 1.61 | 740 | 2285 | 2269 | 2,3   | RI, MS, STD  |
| 506             | 2,4-Di-tert-butylphenol    | 96-76-4    | 2656 | 1.64 | 898 | 2307 | 2317 | 1,2,3 | RI, MS, Tent |
| 507             | 4-Ethenylphenol            | 2628-17-3  | 2756 | 1.44 | 773 | 2410 | 2425 | 3     | RI, MS, STD  |
| <b>Terpenes</b> |                            |            |      |      |     |      |      |       |              |
| 508             | $\delta$ -3-Carene         | 13466-78-9 | 784  | 2.98 | 842 | 1139 | 1166 | 2     | RI, MS, Tent |
| 509             | $\alpha$ -Limonene         | 138-86-3   | 892  | 2.8  | 913 | 1193 | 1200 | 1,2   | RI, MS, STD  |
| 510             | 1,8-Cineole                | 470-82-6   | 920  | 2.97 | 862 | 1207 | 1211 | 1,2,3 | RI, MS, Tent |
| 511             | Terpinolene                | 586-62-9   | 1124 | 2.69 | 886 | 1306 | 1280 | 1     | RI, MS, STD  |
| 512             | $\alpha$ -Thujone          | 546-80-5   | 1340 | 2.44 | 790 | 1414 | 1431 | 3     | RI, MS, Tent |
| 513             | trans-Linalool oxide       | 34995-77-2 | 1460 | 1.99 | 925 | 1476 | 1483 | 3     | RI, MS, Tent |

|     |                             |            |      |      |     |      |      |       |              |
|-----|-----------------------------|------------|------|------|-----|------|------|-------|--------------|
| 514 | cis-Linalool oxide          | 5989-33-3  | 1464 | 2.02 | 921 | 1478 | 1454 | 1,2,3 | RI, MS, Tent |
| 515 | $\alpha$ -Longipinene       | 5989-8-2   | 1472 | 3.59 | 828 | 1483 | 1482 | 1     | RI, MS, Tent |
| 516 | $\alpha$ -Copaene           | 3856-25-5  | 1504 | 3.63 | 831 | 1500 | 1497 | 3     | RI, MS, Tent |
| 517 | Daucene                     | 16661-00-0 | 1508 | 3.63 | 879 | 1502 | 1495 | 1     | RI, MS, STD  |
| 518 | Longicyclene                | 1137-12-8  | 1528 | 3.67 | 889 | 1513 | 1497 | 1     | RI, MS, Tent |
| 519 | Theaspirane B               | 43126-21-2 | 1532 | 3.17 | 717 | 1515 | 1522 | 1     | RI, MS, Tent |
| 520 | Camphor                     | 76-22-2    | 1532 | 3.87 | 758 | 1515 | 1540 | 1,2,3 | RI, MS, STD  |
| 521 | (-)-Camphor                 | 464-48-2   | 1564 | 2.41 | 949 | 1532 | 1532 | 1     | RI, MS, Tent |
| 522 | Vitispirane                 | 65416-59-3 | 1576 | 2.95 | 853 | 1539 | 1527 | 1,3   | RI, MS, Tent |
| 523 | $\alpha$ -Gurjunene         | 489-40-7   | 1580 | 3.77 | 903 | 1541 | 1529 | 1,3   | RI, MS, Tent |
| 524 | Linalool                    | 78-70-6    | 1588 | 1.81 | 947 | 1545 | 1552 | 1,2,3 | RI, MS, STD  |
| 525 | Theaspirane                 | 36431-72-8 | 1600 | 3.11 | 838 | 1552 | 1523 | 1     | RI, MS, Tent |
| 526 | $\alpha$ -Cedrene           | 469-61-4   | 1628 | 3.74 | 877 | 1568 | 1571 | 2     | RI, MS, STD  |
| 527 | Carvomenthone               | 499-70-7   | 1628 | 2.46 | 753 | 1567 | 1552 | 1,3   | RI, MS, Tent |
| 528 | $\beta$ -Funebrene          | 79120-98-2 | 1636 | 3.7  | 860 | 1572 | 1588 | 2,3   | RI, MS, Tent |
| 529 | Junipene                    | 475-20-7   | 1656 | 3.61 | 926 | 1583 | 1583 | 1     | RI, MS, Tent |
| 530 | D-Fenchyl alcohol           | 1632-73-1  | 1664 | 1.87 | 942 | 1586 | 1588 | 1,3   | RI, MS, Tent |
| 531 | $\alpha$ -trans-Bergamotene | 13474-59-4 | 1672 | 3.35 | 903 | 1591 | 1583 | 1     | RI, MS, Tent |
| 532 | $\alpha$ -Guaiene           | 3691-12-1  | 1684 | 3.48 | 860 | 1598 | 1598 | 1     | RI, MS, Tent |
| 533 | $\beta$ -Elemene            | 515-13-9   | 1684 | 3.04 | 908 | 1598 | 1586 | 1     | RI, MS, Tent |
| 534 | Calarene                    | 17334-55-3 | 1692 | 3.62 | 916 | 1602 | 1604 | 1,2,3 | RI, MS, STD  |

|     |                       |            |      |      |     |      |      |       |              |
|-----|-----------------------|------------|------|------|-----|------|------|-------|--------------|
| 535 | trans-Caryophyllene   | 87-44-5    | 1700 | 3.43 | 949 | 1607 | 1581 | 1,3   | RI, MS, STD  |
| 536 | Terpinen-4-ol         | 562-74-3   | 1704 | 2.09 | 940 | 1608 | 1628 | 1,2,3 | RI, MS, STD  |
| 537 | Isophorone            | 78-59-1    | 1708 | 2.07 | 920 | 1610 | 1600 | 1,2,3 | RI, MS, STD  |
| 538 | trans-Edulan          | 41678-29-9 | 1720 | 2.8  | 748 | 1617 | 1620 | 3     | RI, MS, Tent |
| 539 | $\beta$ -Terpineol    | 138-87-4   | 1748 | 1.91 | 862 | 1632 | 1616 | 1     | RI, MS, Tent |
| 540 | $\beta$ -Cyclocitral  | 432-25-7   | 1748 | 2.4  | 824 | 1632 | 1613 | 1,3   | RI, MS, STD  |
| 541 | $\alpha$ -Patchoulene | 560-32-7   | 1776 | 3.86 | 819 | 1648 | 1640 | 1     | RI, MS, Tent |
| 542 | Alloaromadendrene     | 25246-27-9 | 1788 | 3.88 | 884 | 1655 | 1644 | 1,3   | RI, MS, Tent |
| 543 | $\beta$ -Barbatene    | 72346-55-5 | 1800 | 3.84 | 746 | 1662 | 1667 | 1     | RI, MS, Tent |
| 544 | $\gamma$ -Gurjunene   | 22567-17-5 | 1804 | 3.93 | 919 | 1664 | 1674 | 1     | RI, MS, Tent |
| 545 | Isoborneol            | 124-76-5   | 1820 | 2.03 | 803 | 1671 | 1672 | 1     | RI, MS, Tent |
| 546 | $\alpha$ -Humulene    | 6753-98-6  | 1832 | 3.78 | 919 | 1679 | 1680 | 1,3   | RI, MS, Tent |
| 547 | L-Borneol             | 464-45-9   | 1852 | 2.05 | 730 | 1689 | 1675 | 1     | RI, MS, Tent |
| 548 | $\alpha$ -Terpineol   | 98-55-5    | 1872 | 2.02 | 958 | 1700 | 1700 | 1,2   | RI, MS, STD  |
| 549 | $\gamma$ -Amorphene   | 6980-46-7  | 1864 | 3.68 | 895 | 1696 | 1724 | 1     | RI, MS, Tent |
| 550 | Ledene                | 21747-46-6 | 1880 | 3.68 | 902 | 1705 | 1701 | 1     | RI, MS, Tent |
| 551 | trans-Borneol         | 507-70-0   | 1880 | 1.95 | 924 | 1704 | 1679 | 1,2,3 | RI, MS, Tent |
| 552 | $\beta$ -Chamigrene   | 18431-82-8 | 1900 | 3.66 | 864 | 1716 | 1702 | 1     | RI, MS, Tent |
| 553 | Valencene             | 4630-7-3   | 1928 | 3.44 | 899 | 1731 | 1726 | 1     | RI, MS, Tent |
| 554 | $\alpha$ -bisabolene  | 25532-79-0 | 1936 | 3.18 | 878 | 1735 | 1720 | 1,2,3 | RI, MS, STD  |
| 555 | Germacrene A          | 28387-44-2 | 1956 | 3.37 | 839 | 1747 | 1743 | 3     | RI, MS, Tent |

|     |                               |             |      |      |     |      |      |       |              |
|-----|-------------------------------|-------------|------|------|-----|------|------|-------|--------------|
| 556 | $\alpha$ -Chamigrene          | 19912-83-5  | 1960 | 3.46 | 851 | 1749 | 1753 | 1,3   | RI, MS, Tent |
| 557 | $\delta$ -Cadinene            | 483-76-1    | 1988 | 3.25 | 932 | 1764 | 1753 | 1,2,3 | RI, MS, STD  |
| 558 | $\beta$ -Citronellol          | 106-22-9    | 1992 | 1.77 | 889 | 1765 | 1771 | 1     | RI, MS, STD  |
| 559 | 7 epi-a-Selinene              | 123123-37-5 | 2008 | 3.26 | 873 | 1775 | 1772 | 1     | RI, MS, Tent |
| 560 | $\alpha$ -Curcumene           | 644-30-4    | 2016 | 2.79 | 881 | 1779 | 1788 | 1,2   | RI, MS, Tent |
| 561 | Nerol                         | 106-25-2    | 2072 | 1.7  | 845 | 1811 | 1821 | 3     | RI, MS, Tent |
| 562 | Isogeraniol                   | 5944-20-7   | 2096 | 1.69 | 832 | 1827 | 1818 | 3     | RI, MS, Tent |
| 563 | $\beta$ -Damascenone          | 23726-93-4  | 2104 | 2.26 | 910 | 1832 | 1827 | 1,3   | RI, MS, STD  |
| 564 | Dihydro- $\beta$ -ionone      | 17283-81-7  | 2124 | 2.36 | 835 | 1845 | 1854 | 1,2,3 | RI, MS, Tent |
| 565 | L-calamenene                  | 483-77-2    | 2124 | 2.81 | 946 | 1846 | 1838 | 1,2,3 | RI, MS, STD  |
| 566 | Geraniol                      | 106-24-1    | 2132 | 1.7  | 872 | 1850 | 1851 | 1,3   | RI, MS, STD  |
| 567 | trans-Geranylacetone          | 3796-70-1   | 2148 | 2.19 | 877 | 1861 | 1862 | 1,2   | RI, MS, STD  |
| 568 | Geosmin                       | 19700-21-1  | 2148 | 2.32 | 902 | 1861 | 1858 | 1,2,3 | RI, MS, STD  |
| 569 | $\alpha$ -Ionone              | 127-41-3    | 2156 | 2.2  | 846 | 1866 | 1866 | 1     | RI, MS, STD  |
| 570 | $\alpha$ -Dehydro-himachalene | 78204-62-3  | 2184 | 2.61 | 836 | 1885 | 1882 | 1     | RI, MS, Tent |
| 571 | $\alpha$ -Calacorene          | 21391-99-1  | 2248 | 2.53 | 898 | 1930 | 1904 | 1,2,3 | RI, MS, Tent |
| 572 | Palustrol                     | 5986-49-2   | 2264 | 2.46 | 899 | 1941 | 1938 | 1,2,3 | RI, MS, Tent |
| 573 | trans- $\beta$ -Ionone        | 79-77-6     | 2280 | 2.15 | 854 | 1952 | 1953 | 1,2,3 | RI, MS, STD  |
| 574 | cis-Jasmone                   | 488-10-8    | 2292 | 1.99 | 859 | 1961 | 1955 | 3     | RI, MS, STD  |
| 575 | $\beta$ -Caryophyllene oxide  | 1139-30-6   | 2296 | 2.17 | 792 | 1964 | 1990 | 1,2,3 | RI, MS, Tent |
| 576 | D-Nerolidol                   | 142-50-7    | 2388 | 1.84 | 921 | 2036 | 2010 | 1,3   | RI, MS, Tent |

|                 |                                            |            |      |      |     |      |      |       |              |
|-----------------|--------------------------------------------|------------|------|------|-----|------|------|-------|--------------|
| 577             | E-Nerolidol                                | 40716-66-3 | 2392 | 1.82 | 926 | 2040 | 2054 | 2     | RI, MS, Tent |
| 578             | Epicubanol                                 | 19912-67-5 | 2436 | 2.07 | 765 | 2077 | 2078 | 1     | RI, MS, Tent |
| 579             | $\alpha$ -Corocalene                       | 20129-39-9 | 2436 | 2.15 | 863 | 2077 | 2083 | 1     | RI, MS, Tent |
| 580             | Cubanol                                    | 21284-22-0 | 2436 | 2.07 | 787 | 2077 | 2071 | 2     | RI, MS, Tent |
| 581             | 6-Isocedrol                                | 19903-73-2 | 2496 | 1.95 | 894 | 2135 | 2162 | 1     | RI, MS, Tent |
| 582             | $\alpha$ -Cedrol                           | 77-53-2    | 2496 | 1.95 | 877 | 2135 | 2127 | 2,3   | RI, MS, Tent |
| 583             | $\beta$ -Bisabolol                         | 15352-77-9 | 2520 | 1.82 | 728 | 2160 | 2151 | 3     | RI, MS, Tent |
| 584             | Torreyol                                   | 19435-97-3 | 2556 | 1.92 | 815 | 2197 | 2197 | 2,3   | RI, MS, Tent |
| 585             | $\alpha$ -Cadinol                          | 481-34-5   | 2556 | 1.92 | 810 | 2197 | 2217 | 1,3   | RI, MS, STD  |
| 586             | $\alpha$ -Eudesmol                         | 473-16-5   | 2592 | 1.98 | 719 | 2237 | 2223 | 3     | RI, MS, Tent |
| 587             | $\beta$ -Eudesmol                          | 473-15-4   | 2600 | 2    | 821 | 2246 | 2246 | 3     | RI, MS, Tent |
| 588             | Farnesol                                   | 4602-84-0  | 2700 | 1.95 | 846 | 2353 | 2351 | 2     | RI, MS, Tent |
| 589             | 9H-Fluorene                                | 86-73-7    | 2732 | 2.16 | 907 | 2386 | 2374 | 2,3   | RI, MS, Tent |
| <b>Lactones</b> |                                            |            |      |      |     |      |      |       |              |
| 590             | $\gamma$ -Pentalactone                     | 108-29-2   | 1744 | 1.71 | 922 | 1630 | 1648 | 1,3   | RI, MS, STD  |
| 591             | Butyrolactone                              | 96-48-0    | 1784 | 1.68 | 955 | 1652 | 1643 | 1,2,3 | RI, MS, STD  |
| 592             | $\gamma$ -Vinyl- $\gamma$ -valerolactone   | 1073-11-6  | 1848 | 1.87 | 917 | 1687 | 1679 | 2     | RI, MS, Tent |
| 593             | $\gamma$ -Caprolactone                     | 695-06-7   | 1916 | 1.83 | 784 | 1724 | 1703 | 1     | RI, MS, STD  |
| 594             | $\alpha$ -Methyl- $\gamma$ -crotonolactone | 22122-36-7 | 1948 | 1.65 | 940 | 1741 | 1726 | 2,3   | RI, MS, Tent |
| 595             | 3,4-Dimethyl-2,5-furandione                | 766-39-2   | 1968 | 1.68 | 777 | 1752 | 1764 | 2     | RI, MS, STD  |
| 596             | $\gamma$ -Crotonolactone                   | 497-23-4   | 2016 | 1.52 | 942 | 1778 | 1787 | 2,3   | RI, MS, STD  |

|     |                                                |            |      |      |     |      |      |       |              |
|-----|------------------------------------------------|------------|------|------|-----|------|------|-------|--------------|
| 597 | $\delta$ -Hexalactone                          | 823-22-3   | 2080 | 1.76 | 937 | 1816 | 1818 | 1,2,3 | RI, MS, Tent |
| 598 | $\gamma$ -Octalactone                          | 104-50-7   | 2264 | 1.77 | 956 | 1941 | 1924 | 2,3   | RI, MS, Tent |
| 599 | $\delta$ -Octalactone                          | 698-76-0   | 2336 | 1.79 | 772 | 1993 | 1999 | 2,3   | RI, MS, Tent |
| 600 | $\gamma$ -Nonalactone                          | 104-61-0   | 2408 | 1.7  | 937 | 2053 | 2044 | 1     | RI, MS, STD  |
| 601 | $\gamma$ -Carboethoxy- $\gamma$ -butyrolactone | 1126-51-8  | 2512 | 1.49 | 727 | 2151 | 2168 | 3     | RI, MS, Tent |
| 602 | $\gamma$ -Decalactone                          | 706-14-9   | 2532 | 1.68 | 905 | 2172 | 2149 | 1,2,3 | RI, MS, STD  |
| 603 | $\delta$ -Decalactone                          | 705-86-2   | 2580 | 1.79 | 801 | 2224 | 2220 | 2,3   | RI, MS, Tent |
| 604 | $\gamma$ -Dodecalactone                        | 2305-5-7   | 2748 | 2.07 | 885 | 2403 | 2381 | 2     | RI, MS, STD  |
| 605 | $\gamma$ -6-(Z)-Dodecenolactone                | 18679-18-0 | 2772 | 2.08 | 874 | 2426 | 2425 | 1,2,3 | RI, MS, Tent |
| 606 | $\delta$ -Heptyl- $\delta$ -valerolactone      | 713-95-1   | 2808 | 2.22 | 814 | 2460 | 2458 | 3     | RI, MS, Tent |

<sup>a</sup> RT1: retention time on the primary column.

<sup>b</sup> RT2: retention time on the secondary column.

<sup>c</sup> LRIcal: calculated linear retention indices.

<sup>d</sup> LRIlit: literature linear retention indices obtained from the NIST library (<https://webbook.nist.gov/chemistry/>).

<sup>e</sup> Origin: compounds identified by “1” HS-SPME-GC×GC-TOFMS, “2” SPE-GC×GC-TOFMS, “3” SBSE-GC×GC-TOFMS.

<sup>f</sup> Identification: tentative identification (Tent.) based on retention indices (RI) and mass spectra (MS), positive identification based on retention times of authentic standards (STD).

**Table S2.** Peak area of 606 volatile compounds identified in Chinese herbaceous aroma-type Baijiu.

| NO. | Compounds                 | Area <sup>a</sup> & RSD |           |           |          |           |          |
|-----|---------------------------|-------------------------|-----------|-----------|----------|-----------|----------|
|     | Esters                    | SPME                    | RSD       | SPE       | RSD      | SBSE      | RSD      |
| 1   | Methyl acetate            | 209845                  | 16788     | -         | -        | -         | -        |
| 2   | Ethyl acetate             | 59168668                | 5325180   | -         | -        | 68874663  | 6198720  |
| 3   | Ethyl propanoate          | 3784650                 | 378465    | 17450771  | 4498021  | 9193378   | 919338   |
| 4   | Ethyl 2-methyl propanoate | 918006934               | 100980763 | 2457528   | 270328   | 1877440   | 206518   |
| 5   | Propyl acetate            | 111253363               | 6675202   | 162737695 | 9764262  | 351467    | 21088    |
| 6   | 2-Butyl acetate           | 42866784                | 2657741   | 182922837 | 11341216 | 324213476 | 20101236 |
| 7   | Methyl butanoate          | -                       | -         | 19905183  | 1273932  | -         | -        |
| 8   | Ethyl acrylate            | -                       | -         | 1186052   | 78279    | 148206    | 9782     |
| 9   | Methyl 2-methylbutyrate   | -                       | -         | 764041    | 51955    | -         | -        |
| 10  | Isobutyl acetate          | 333336983               | 23673589  | 204341025 | 14303872 | 2970513   | 207936   |
| 11  | Methyl isovalerate        | -                       | -         | 2109554   | 151888   | -         | -        |
| 12  | Allyl acetate             | -                       | -         | 973004    | 72002    | -         | -        |
| 13  | Ethyl butanoate           | 128228                  | 9745      | 33052     | 2512     | 3573013   | 271549   |
| 14  | Propyl propionate         | -                       | -         | 61632259  | 4807316  | 362715    | 28292    |
| 15  | Ethyl 2-methylbutanoate   | 20731123                | 1658490   | 200003071 | 16000246 | 5727750   | 458220   |
| 16  | Butyl acetate             | 75083897                | 6156880   | 52477241  | 4303134  | 17550135  | 1439111  |
| 17  | Ethyl 3-methylbutanoate   | 65338655                | 5488447   | 47136     | 3959     | 398409    | 33466    |

|    |                                  |            |          |           |          |            |           |
|----|----------------------------------|------------|----------|-----------|----------|------------|-----------|
| 18 | Methyl pentanoate                | 45108      | 3879     | 11025200  | 948167   | 173008     | 14879     |
| 19 | Isobutyl isobutyrate             | 39665864   | 3490596  | 4998456   | 439864   | -          | -         |
| 20 | Isobutyl propanoate              | 44623882   | 3168296  | 58759728  | 4171941  | 141172471  | 10023245  |
| 21 | Propyl butyrate                  | 1026598791 | 73915113 | 263709173 | 18987060 | 8696564    | 626153    |
| 22 | 3-Methylbutyl acetate            | 698234323  | 50971106 | 45459692  | 3318558  | 2639292    | 192668    |
| 23 | sec-Butyl butyrate               | 38128056   | 2821476  | 3941376   | 291662   | 155036     | 11473     |
| 24 | Propyl 2-methylbutanoate         | 2221291    | 166597   | 1652170   | 123913   | -          | -         |
| 25 | Butyl propionate                 | -          | -        | 30071082  | 2285402  | -          | -         |
| 26 | 1-Methylpropyl 2-methylbutanoate | 65019      | 5006     | -         | -        | -          | -         |
| 27 | Butyl isobutyrate                | -          | -        | 6589584   | 513988   | -          | -         |
| 28 | Propyl isovalerate               | 68823629   | 5437067  | 20808719  | 1643889  | 341961950  | 27014994  |
| 29 | Isobutyl isovalerate             | -          | -        | 3405933   | 272475   | -          | -         |
| 30 | Ethyl valerate                   | 245792747  | 19909213 | 4575481   | 370614   | 1307822129 | 105933592 |
| 31 | Ethyl 2-butenolate               | -          | -        | 2937740   | 240895   | 2852061    | 233869    |
| 32 | Isobutyl butyrate                | 365845594  | 30365184 | 83339362  | 6917167  | -          | -         |
| 33 | Isobutyl 2-methylbutanoate       | -          | -        | 316795    | 26611    | -          | -         |
| 34 | Allyl butanoate                  | -          | -        | 1744188   | 148256   | -          | -         |
| 35 | Ethyl 3-methylvalerate           | -          | -        | 547692    | 47102    | -          | -         |
| 36 | Isopentyl isobutyrate            | 337856     | 17569    | -         | -        | -          | -         |
| 37 | Methyl hexanoate                 | 174038078  | 9224018  | 118498406 | 6280416  | 1322152821 | 70074100  |
| 38 | Amyl acetate                     | 16859297   | 910402   | 29222445  | 1578012  | 2225471    | 120175    |



|    |                             |           |          |          |         |           |         |
|----|-----------------------------|-----------|----------|----------|---------|-----------|---------|
| 39 | Ethyl 4-methylvalerate      | 9655882   | 531074   | 22171489 | 1219432 | 1391205   | 76516   |
| 40 | 2-Pentyl butanoate          | -         | -        | 5665093  | 317245  | 47506     | 2660    |
| 41 | Isoamyl propionate          | -         | -        | -        | -       | 191257    | 10902   |
| 42 | Butyl butyrate              | 430724    | 24982    | 27379849 | 1588031 | -         | -       |
| 43 | Propyl valerate             | 212923538 | 12562489 | 44766053 | 2641197 | -         | -       |
| 44 | 2-Butyl-n-valerate          | -         | -        | 967128   | 58028   | -         | -       |
| 45 | Pentyl isobutyrate          | -         | -        | 1091176  | 66562   | -         | -       |
| 46 | Butyl isovalerate           | -         | -        | 6098001  | 378076  | -         | -       |
| 47 | Isobutyl valerate           | -         | -        | 19448294 | 1225243 | -         | -       |
| 48 | Ethyl hexanoate             | 22830546  | 1461155  | 1494043  | 95619   | 5993132   | 383560  |
| 49 | 1-Methylhexyl acetate       | -         | -        | 59330781 | 3856501 | -         | -       |
| 50 | Isopentyl butanoate         | 618103    | 40795    | -        | -       | -         | -       |
| 51 | Hexyl acetate               | 68508582  | 4590075  | 531720   | 35625   | 18086390  | 1211788 |
| 52 | Isopentyl 2-methylbutanoate | 38758895  | 2635605  | 3120359  | 212184  | 10477600  | 712477  |
| 53 | Methyl heptanoate           | 6751017   | 465820   | -        | -       | 27126051  | 1871698 |
| 54 | Isopentyl isovalerate       | 55236687  | 3866568  | 5571361  | 389995  | -         | -       |
| 55 | Ethyl (E)-3-hexenoate       | 27075186  | 1922338  | 5358343  | 380442  | 8277019   | 587668  |
| 56 | Ethyl lactate               | -         | -        | -        | -       | 165759    | 11935   |
| 57 | Propyl hexanoate            | 7033988   | 513481   | 385008   | 28106   | 989363    | 72223   |
| 58 | (Z)-3-hexen-1-yl acetate    | -         | -        | -        | -       | 243654    | 18030   |
| 59 | Ethyl 2-hydroxypropanoate   | -         | -        | 34549491 | 2591212 | 111701097 | 8377582 |

|    |                                  |           |          |          |         |            |           |
|----|----------------------------------|-----------|----------|----------|---------|------------|-----------|
| 60 | Amyl 2-methylbutyrate            | 11805063  | 897185   | 649331   | 49349   | 2063856    | 156853    |
| 61 | Ethyl $\beta$ -ethoxypropionate  | 2725870   | 209892   | 5431315  | 418211  | 13428170   | 1033969   |
| 62 | Ethyl 2-hexenoate                | -         | -        | 111039   | 8661    | -          | -         |
| 63 | Ethyl heptanoate                 | 184321276 | 14561381 | 71124    | 5619    | 487704     | 38529     |
| 64 | Hexyl propanoate                 | 194804    | 15584    | 12425370 | 994030  | 46322051   | 3705764   |
| 65 | Hexyl isobutyrate                | 33933970  | 2748652  | 3507824  | 284134  | 137982     | 11177     |
| 66 | Amyl isovalerate                 | 392115    | 32153    | 421108   | 34531   | 1744349    | 143037    |
| 67 | Isobutyl hexanoate               | 225798    | 18741    | 946122   | 78528   | 80042538   | 6643531   |
| 68 | Isoamyl valerate                 | 228587255 | 19201329 | 4255197  | 357437  | 1216274580 | 102167065 |
| 69 | 2-Propenyl hexanoate             | 17791736  | 1512298  | 2130673  | 181107  | -          | -         |
| 70 | Heptyl acetate                   | 9002080   | 774179   | 581658   | 50023   | 5743723    | 493960    |
| 71 | Ethyl Z-4-heptenoate             | 827990    | 72035    | -        | -       | 689046     | 59947     |
| 72 | Methyl octanoate                 | 26011337  | 2288998  | 1748974  | 153910  | 10362063   | 911862    |
| 73 | 2-Heptyl butanoate               | -         | -        | 753328   | 67046   | 335322     | 29844     |
| 74 | Cyclopentyl butyrate             | 674435    | 60699    | -        | -       | -          | -         |
| 75 | Ethyl 2-hydroxybutyrate          | 4116176   | 374572   | 2355684  | 214367  | -          | -         |
| 76 | Ethyl 3-hydroxy-3-methylbutyrate | -         | -        | 371026   | 16696   | -          | -         |
| 77 | Butyl hexanoate                  | 16385742  | 753744   | 331730   | 15260   | 2405517    | 110654    |
| 78 | Propyl heptanoate                | -         | -        | 18585654 | 873526  | 38562790   | 1812451   |
| 79 | Hexyl butanoate                  | 21685118  | 1040886  | 61984163 | 2975240 | 66390672   | 3186752   |
| 80 | Isopropyl octanoate              | -         | -        | 66948    | 3280    | 242722583  | 11893407  |

|     |                                  |           |          |           |         |            |          |
|-----|----------------------------------|-----------|----------|-----------|---------|------------|----------|
| 81  | Propyl lactate                   | 33718989  | 1685949  | 765638    | 38282   | 56858739   | 2842937  |
| 82  | Ethyl 2-hydroxy-3-methylbutyrate | 161855413 | 8254626  | 110203517 | 5620379 | 1229602124 | 62709708 |
| 83  | Hexyl 2-methylbutyrate           | 86473112  | 4496602  | 4699073   | 244352  | 5453284    | 283571   |
| 84  | Ethyl cyclohexanoate             | 5489867   | 290963   | 531406    | 28165   | 7426470    | 393603   |
| 85  | Ethyl octoate                    | 109494    | 5913     | 279857    | 15112   | 867700     | 46856    |
| 86  | Heptyl propionate                | 227071    | 12489    | -         | -       | 320814     | 17645    |
| 87  | Hexyl isopentanoate              | 46751862  | 2618104  | 2794974   | 156519  | 5527379    | 309533   |
| 88  | Isoamyl hexanoate                | -         | -        | 97995604  | 5585749 | 4752415    | 270888   |
| 89  | Isobutyl heptanoate              | 769934    | 44656    | -         | -       | -          | -        |
| 90  | Isobutyl lactate                 | 30530096  | 1801276  | 91373534  | 5391039 | 54711341   | 3227969  |
| 91  | 2-Methylbutyl hexanoate          | 615433577 | 36926015 | 6605472   | 396328  | -          | -        |
| 92  | 2-Ethylhexyl 2-propenoate        | 913067    | 55697    | -         | -       | -          | -        |
| 93  | Ethyl 7-octenoate                | 3448112   | 213783   | 300596    | 18637   | 829191     | 51410    |
| 94  | Ethyl diethoxyacetate            | 1586051   | 99921    | 1783499   | 112360  | 5430091    | 342096   |
| 95  | Methyl nonanoate                 | 519358    | 33239    | -         | -       | -          | -        |
| 96  | Pentyl hexanoate                 | 174229    | 11325    | 82771     | 5380    | 2312783    | 150331   |
| 97  | Ethyl 3-hydroxybutyrate          | 2290060   | 151144   | 1234681   | 81489   | -          | -        |
| 98  | Heptyl butanoate                 | 55689     | 3731     | -         | -       | -          | -        |
| 99  | Butyl 2-hydroxypropanoate        | 100733    | 6850     | 37243837  | 2532581 | 22934103   | 1559519  |
| 100 | Propyl octanoate                 | 182586165 | 12598445 | 27064859  | 1867475 | 7176582    | 495184   |
| 101 | Heptyl 2-methylbutanoate         | 100733    | 7051     | -         | -       | -          | -        |

|     |                                    |          |         |           |         |           |         |
|-----|------------------------------------|----------|---------|-----------|---------|-----------|---------|
| 102 | Ethyl nonanoate                    | 33411750 | 2372234 | 994260    | 70592   | 18726     | 1330    |
| 103 | Octyl propanoate                   | 1120077  | 80646   | -         | -       | -         | -       |
| 104 | Ethyl 2-hydroxy-4-methylpentanoate | 31504922 | 2299859 | -         | -       | 29471013  | 2151384 |
| 105 | Ethyl E-2-octenoate                | -        | -       | -         | -       | 82518     | 6106    |
| 106 | Isopentyl heptanoate               | -        | -       | -         | -       | 2474514   | 185589  |
| 107 | Nonyl acetate                      | 671575   | 51040   | -         | -       | -         | -       |
| 108 | Ethyl 3-acetoxybutanoate           | -        | -       | -         | -       | 388668    | 29927   |
| 109 | Diethyl propanedioate              | 241541   | 18840   | 684292    | 53375   | 672087    | 52423   |
| 110 | 2-Heptyl hexanoate                 | 286499   | 22633   | 7422111   | 586347  | 1348787   | 106554  |
| 111 | 2-Camphanol acetate                | -        | -       | -         | -       | 328610    | 26289   |
| 112 | 3-methyl-2-butenyl hexanoate       | 14111491 | 1270034 | -         | -       | -         | -       |
| 113 | Methyl decanoate                   | 2385806  | 238581  | -         | -       | 159572    | 15957   |
| 114 | Hexyl hexanoate                    | 34963103 | 3845941 | 8929847   | 982283  | 97008     | 10671   |
| 115 | Ethyl levulate                     | 807528   | 48452   | 4758751   | 285525  | 1410544   | 84633   |
| 116 | Octyl butanoate                    | 11214426 | 695294  | 283010    | 17547   | -         | -       |
| 117 | Butyl octanoate                    | 465981   | 29823   | 4864536   | 311330  | -         | -       |
| 118 | Octyl 2-methylbutanoate            | 331109   | 21853   | -         | -       | -         | -       |
| 119 | Methyl benzoate                    | 1691868  | 115047  | 1031799   | 70162   | 5686049   | 386651  |
| 120 | Ethyl decanoate                    | 1013429  | 70940   | 115988506 | 8119195 | 132315833 | 9262108 |
| 121 | Ethyl methyl butanedioate          | -        | -       | 472109    | 33992   | 266539    | 19191   |
| 122 | Diethyl fumarate                   | 525583   | 38893   | 285386    | 21119   | 1752732   | 129702  |

|     |                               |           |         |          |         |           |          |
|-----|-------------------------------|-----------|---------|----------|---------|-----------|----------|
| 123 | Isoamyl octanoate             | 2187233   | 166230  | 200448   | 15234   | 225222    | 17117    |
| 124 | Ethyl trans-4-decenoate       | 130405    | 10172   | -        | -       | 235335    | 18356    |
| 125 | Isopropyl benzoate            | 170542    | 13643   | -        | -       | 188776    | 15102    |
| 126 | Diethyl succinate             | 17391     | 1426    | 39084    | 3205    | 262771    | 21547    |
| 127 | Ethyl benzoate                | 27999659  | 2351971 | 49832401 | 4185922 | 46338499  | 3892434  |
| 128 | Ethyl 3-hydroxyhexanoate      | -         | -       | 1656812  | 142486  | -         | -        |
| 129 | Ethyl cis-4-decenoate         | 703092    | 61872   | -        | -       | -         | -        |
| 130 | Ethyl 9-decenoate             | 177496    | 12602   | -        | -       | -         | -        |
| 131 | $\alpha$ -Terpineol acetate   | 333602    | 24019   | -        | -       | -         | -        |
| 132 | $\alpha$ -Phenylethyl acetate | -         | -       | -        | -       | 124904    | 9118     |
| 133 | Propyl decanoate              | -         | -       | 1457006  | 107818  | 300791    | 22259    |
| 134 | Benzyl acetate                | 959295    | 71947   | 618630   | 46397   | 3665894   | 274942   |
| 135 | Ethyl undecanoate             | 2817758   | 214150  | 1076617  | 81823   | 148788    | 11308    |
| 136 | Butyl butyrolactate           | 2182058   | 168018  | -        | -       | -         | -        |
| 137 | Ethyl trans-2-decenoate       | 584718    | 45608   | -        | -       | -         | -        |
| 138 | Propyl benzoate               | 893562    | 70591   | -        | -       | -         | -        |
| 139 | Methyl phenylacetate          | 1348511   | 107881  | 1117720  | 89418   | 2123240   | 169859   |
| 140 | Ethyl glutarate               | -         | -       | 323376   | 26193   | 1843550   | 149328   |
| 141 | Benzyl isobutanoate           | 559967    | 45917   | -        | -       | -         | -        |
| 142 | Methyl salicylate             | -         | -       | -        | -       | 413143    | 34291    |
| 143 | Ethyl phenylacetate           | 105739506 | 8882119 | -        | -       | 119654159 | 10050949 |

|     |                                  |           |         |          |         |           |          |
|-----|----------------------------------|-----------|---------|----------|---------|-----------|----------|
| 144 | Isobutyl benzoate                | 1428704   | 121440  | 316283   | 26884   | 1281367   | 108916   |
| 145 | Benzyl propionate                | 1231754   | 105931  | -        | -       | 1139546   | 98001    |
| 146 | Hexyl octanoate                  | 137791    | 7165    | 77817    | 4046    | 233109    | 12122    |
| 147 | $\beta$ -Phenethyl acetate       | 80687954  | 4276462 | 53982639 | 2861080 | 81786     | 4335     |
| 148 | Ethyl dodecanoate                | 128489127 | 6938413 | 55969973 | 3022379 | 47825663  | 2582586  |
| 149 | Methyl benzenepropanoate         | 1031282   | 56721   | -        | -       | 4122987   | 226764   |
| 150 | n-Butyl benzoate                 | 671327    | 37594   | -        | -       | -         | -        |
| 151 | Benzyl butanoate                 | -         | -       | -        | -       | 5626704   | 320722   |
| 152 | $\beta$ -Phenylethyl isobutyrate | -         | -       | -        | -       | 16808684  | 974904   |
| 153 | Ethyl 3-phenylpropionate         | 424791    | 25063   | 192348   | 11349   | 240895    | 14213    |
| 154 | Propyl dodecanoate               | 721987    | 43319   | -        | -       | 473280    | 28397    |
| 155 | Isoamyl benzoate                 | 1383932   | 84420   | -        | -       | 20395186  | 1244106  |
| 156 | Benzenepropyl acetate            | 664755    | 41215   | -        | -       | 3133000   | 194246   |
| 157 | Butyl phenylacetate              | 23011779  | 1449742 | 4747252  | 299077  | 21888194  | 1378956  |
| 158 | 2-Phenylethyl butanoate          | 14286373  | 914328  | -        | -       | 161154384 | 10313881 |
| 159 | Phenethyl 2-methylbutyrate       | 14111491  | 917247  | -        | -       | -         | -        |
| 160 | Phenethyl isovalerate            | 17893562  | 1180975 | 1754258  | 115781  | 3700843   | 244256   |
| 161 | Ethyl tetradecanoate             | -         | -       | 13236833 | 886868  | 37477711  | 2511007  |
| 162 | Diethyl dl-malate                | -         | -       | 198536   | 13500   | -         | -        |
| 163 | Triacetyl glycerol               | -         | -       | 5959668  | 411217  | -         | -        |
| 164 | Diethyl octanedioate             | -         | -       | 66750    | 4673    | 238001    | 16660    |

|     |                           |           |          |          |         |          |         |
|-----|---------------------------|-----------|----------|----------|---------|----------|---------|
| 165 | Ethyl cinnamate           | 1388781   | 98603    | 785996   | 55806   | 69446    | 4931    |
| 166 | Ethyl pentadecanoate      | 828562    | 59656    | 221805   | 15970   | 530270   | 38179   |
| 167 | Hexyl phenylacetate       | 1394759   | 101817   | 853874   | 62333   | -        | -       |
| 168 | Methyl hexadecanoate      | -         | -        | -        | -       | 37582    | 2781    |
| 169 | Ethyl hexadecanoate       | 222310    | 16673    | 125467   | 9410    | 118843   | 8913    |
| 170 | Ethyl hexadec-9-enoate    | -         | -        | 1589937  | 120835  | 108800   | 8269    |
| 171 | Hexyl dihydrocinnamate    | 1037441   | 79883    | -        | -       | -        | -       |
| 172 | Ethyl heptadecanoate      | -         | -        | 151895   | 11848   | 1881888  | 146787  |
| 173 | Propyl hexadecanoate      | -         | -        | -        | -       | 14082061 | 1112483 |
| 174 | Ethyl hydrogen succinate  | 3461152   | 276892   | 11881839 | 950547  | -        | -       |
| 175 | Butyl hexadecanoate       | -         | -        | -        | -       | 1552624  | 125763  |
| 176 | Ethyl octadecanoate       | -         | -        | -        | -       | 103101   | 8454    |
| 177 | Ethyl cis-9-octadecenoate | -         | -        | 6105539  | 506760  | 4777822  | 396559  |
| 178 | Ethyl linoleate           | -         | -        | 110293   | 9265    | 68036234 | 5715044 |
| 179 | Ethyl vanillate           | -         | -        | 421139   | 35797   | 31571    | 2684    |
|     | <b>Alcohols</b>           |           |          |          |         |          |         |
| 180 | 2-Propanol                | 2271224   | 197596   | -        | -       | -        | -       |
| 181 | 2-Butanol                 | 583034821 | 51307064 | 3672614  | 323190  | 323209   | 28442   |
| 182 | 1-Propanol                | 20596081  | 1833051  | -        | -       | 18527613 | 1648958 |
| 183 | 2-Methyl-3-buten-2-ol     | -         | -        | 1297191  | 116747  | -        | -       |
| 184 | 2-Methyl-1-propanol       | 378543    | 34447    | 86170912 | 7841553 | 1996208  | 181655  |

---

|     |                       |           |          |           |          |          |         |
|-----|-----------------------|-----------|----------|-----------|----------|----------|---------|
| 185 | 3-Pentanol            | -         | -        | 569797    | 25641    | -        | -       |
| 186 | 2-Pentanol            | -         | -        | 241694866 | 11117964 | 65728928 | 3023531 |
| 187 | 1-Butanol             | 1359727   | 63907    | 104671    | 4920     | 822950   | 38679   |
| 188 | 2-Methyl-3-pentanol   | 288043    | 13826    | -         | -        | -        | -       |
| 189 | 3-Penten-2-ol         | -         | -        | 53944478  | 2643279  | -        | -       |
| 190 | 3-Hexanol             | -         | -        | 346560    | 17328    | -        | -       |
| 191 | 2-Methylbutanol       | 176996    | 9027     | 4448697   | 226884   | -        | -       |
| 192 | 3-Methyl-1-butanol    | 398843    | 20740    | 130762190 | 6799634  | 2979206  | 154919  |
| 193 | 2-Hexanol             | 129307189 | 6853281  | 51353     | 2722     | 1316598  | 69780   |
| 194 | 3-Methyl-3-buten-1-ol | 1505884   | 81318    | 2778742   | 150052   | -        | -       |
| 195 | 1-Pentanol            | 39083     | 2150     | 115359885 | 6344794  | 98573474 | 5421541 |
| 196 | 4-Heptanol            | 1666805   | 93341    | 527195    | 29523    | 1843916  | 103259  |
| 197 | 2-(Z)-Pentenol        | -         | -        | 342210    | 19506    | -        | -       |
| 198 | (S)-2-Heptanol        | -         | -        | -         | -        | 11853581 | 687508  |
| 199 | 2-Ethyl-1-butanol     | -         | -        | 246134    | 14522    | 131727   | 7772    |
| 200 | 2-Methyl-1-pentanol   | -         | -        | -         | -        | 3642435  | 218546  |
| 201 | Cyclopentanol         | 27937633  | 1704196  | 1912939   | 116689   | -        | -       |
| 202 | Prenol                | -         | -        | 2969819   | 184129   | 183856   | 11399   |
| 203 | 4-Methyl-1-pentanol   | 161749    | 10190    | -         | -        | 43598998 | 2746737 |
| 204 | 2-Heptanol            | 291653656 | 18665834 | 131421701 | 8410989  | 23286380 | 1490328 |
| 205 | 3-Methyl-1-pentanol   | 6257938   | 406766   | 6714062   | 436414   | 3159860  | 205391  |

---



|     |                        |          |         |           |          |         |        |
|-----|------------------------|----------|---------|-----------|----------|---------|--------|
| 206 | 3-Methyl-cyclopentanol | -        | -       | 701948    | 46329    | -       | -      |
| 207 | 1-Hexanol              | 367879   | 24648   | 543185488 | 36393428 | 33203   | 2225   |
| 208 | 3-Hexen-1-ol           | 908854   | 61802   | -         | -        | -       | -      |
| 209 | 5-Methyl-2-heptanol    | -        | -       | -         | -        | 1991722 | 137429 |
| 210 | 3-Ethoxy-1-propanol    | 3825144  | 267760  | 989825    | 69288    | -       | -      |
| 211 | 4-Octanol              | 1015434  | 72096   | -         | -        | 1020168 | 72432  |
| 212 | 4-Methyl-3-penten-1-ol | -        | -       | 3270807   | 235498   | 269921  | 19434  |
| 213 | 3-Octanol              | 270631   | 19756   | 2964644   | 216419   | 698702  | 51005  |
| 214 | Cyclohexanol           | -        | -       | 158772    | 11749    | -       | -      |
| 215 | 2-Butoxy-ethanol       | 190326   | 14274   | 332527    | 24940    | 119544  | 8966   |
| 216 | cis-2-Hexenol          | -        | -       | -         | -        | 102435  | 7785   |
| 217 | 3-Methyl-1-hexanol     | 2892553  | 222727  | -         | -        | 410009  | 31571  |
| 218 | 5-Hexen-1-ol           | 1314246  | 102511  | -         | -        | -       | -      |
| 219 | 4-Methyl-1-hexanol     | 57736    | 4561    | 645625    | 51004    | 3475131 | 274535 |
| 220 | 1-Octen-3-ol           | 82903057 | 6632245 | 21348616  | 1707889  | 4899801 | 391984 |
| 221 | 1-Heptanol             | 2039465  | 183552  | 62203     | 5598     | 2592952 | 233366 |
| 222 | 6-Methyl-5-hepten-2-ol | 1638885  | 163889  | 105675    | 10568    | 2102998 | 210300 |
| 223 | 4-Nonanol              | 916313   | 100794  | -         | -        | 1203090 | 132340 |
| 224 | 2-Ethyl-1-hexanol      | 337197   | 20232   | 460112    | 27607    | 124405  | 7464   |
| 225 | 4-Hepten-1-ol          | 206160   | 12782   | 180873    | 11214    | -       | -      |
| 226 | (E)-2-Hepten-1-ol      | 2029479  | 129887  | 365999    | 23424    | 2904321 | 185877 |

---

|     |                            |         |        |          |         |         |        |
|-----|----------------------------|---------|--------|----------|---------|---------|--------|
| 227 | 2-Nonanol                  | 2245668 | 148214 | 2406294  | 158815  | 622718  | 41099  |
| 228 | 1-Octanol                  | 245294  | 16680  | 37521500 | 2551462 | 105159  | 7151   |
| 229 | p-Menthan-8-ol             | -       | -      | -        | -       | 717467  | 50223  |
| 230 | 5-Decanol                  | 127250  | 9162   | -        | -       | -       | -      |
| 231 | [S,S]-2,3-Butanediol       | 921584  | 68197  | -        | -       | -       | -      |
| 232 | (Z)-3-Octen-1-ol           | -       | -      | -        | -       | 617132  | 46902  |
| 233 | (Z)-5-Octen-1-ol           | 113666  | 8866   | -        | -       | -       | -      |
| 234 | (E)-2-Octen-1-ol           | 6109714 | 488777 | 108093   | 8647    | -       | -      |
| 235 | 2-Octen-1-ol               | -       | -      | -        | -       | 193739  | 15887  |
| 236 | 2,6-Dimethyl-5-hepten-1-ol | 171103  | 14373  | -        | -       | -       | -      |
| 237 | 1-Nonanol                  | 442972  | 38096  | 5367797  | 461631  | 143401  | 12332  |
| 238 | 6-Undecanol                | 445767  | 39227  | -        | -       | -       | -      |
| 239 | Undecan-4-ol               | 24777   | 1759   | -        | -       | -       | -      |
| 240 | (Z)-3-Nonen-1-ol           | -       | -      | 896486   | 64547   | 5337680 | 384313 |
| 241 | (E)-2-Nonen-1-ol           | 460125  | 33589  | -        | -       | 327542  | 23911  |
| 242 | 2-Undecanol                | 154185  | 11410  | -        | -       | 381224  | 28211  |
| 243 | cis-6-Nonen-1-ol           | 298411  | 22381  | -        | -       | 552390  | 41429  |
| 244 | 1-Decanol                  | 22844   | 1736   | 349969   | 26598   | 95192   | 7235   |
| 245 | 1-Methyl-1-phenylethanol   | -       | -      | 215158   | 16567   | 82791   | 6375   |
| 246 | (Z)-4-Decen-1-ol           | 369530  | 28823  | -        | -       | -       | -      |
| 247 | (Z)-3-Decen-1-ol           | -       | -      | -        | -       | 1250174 | 98764  |

---

|              |                                   |          |         |           |         |         |        |
|--------------|-----------------------------------|----------|---------|-----------|---------|---------|--------|
| 248          | $\alpha$ -Phenylethyl alcohol     | -        | -       | 2424960   | 193997  | 1082704 | 86616  |
| 249          | 2-Decen-1-ol                      | 236581   | 19163   | -         | -       | -       | -      |
| 250          | p-Cymen-8-ol                      | 980273   | 80382   | 289013    | 23699   | 167061  | 13699  |
| 251          | 1-Undecanol                       | 354617   | 29433   | -         | -       | -       | -      |
| 252          | Benzenemethanol                   | 357549   | 30034   | 13327424  | 1119504 | 2848439 | 239269 |
| 253          | $\alpha$ -Ethylbenzyl alcohol     | -        | -       | -         | -       | 236581  | 20109  |
| 254          | trans-2-Undecen-1-ol              | 177536   | 15268   | -         | -       | -       | -      |
| 255          | Phenylethyl Alcohol               | 15679146 | 815316  | 27176873  | 1413197 | 2069688 | 107624 |
| 256          | 6,10-Dimethyl-5,9-undecadien-2-ol | 76134    | 4035    | -         | -       | -       | -      |
| 257          | 1-Dodecanol                       | 1719950  | 92877   | -         | -       | -       | -      |
| 258          | Diethylene glycol                 | 128277   | 7055    | 230581    | 12682   | 87211   | 4797   |
| 259          | Benzenepropanol                   | -        | -       | 3970084   | 222325  | -       | -      |
| 260          | 1-Hexadecanol                     | 111566   | 6359    | -         | -       | -       | -      |
| <b>Acids</b> |                                   |          |         |           |         |         |        |
| 261          | Acetic acid                       | 34047    | 2009    | 1844919   | 108850  | 59769   | 3526   |
| 262          | Formic acid                       | 18534201 | 1112052 | 46316759  | 2779006 | 242512  | 14551  |
| 263          | Propanoic acid                    | 21232408 | 1295177 | 1389459   | 84757   | 5573612 | 339990 |
| 264          | 2-Methyl-propanoic acid           | 114514   | 7100    | 20391577  | 1264278 | 38334   | 2377   |
| 265          | Butanoic acid                     | 80549525 | 5074620 | 238144    | 15003   | 415345  | 26167  |
| 266          | 2-Methyl butyric acid             | -        | -       | 146633904 | 9384570 | -       | -      |
| 267          | Pentanoic acid                    | 1210504  | 78683   | 870073    | 56555   | 102497  | 6662   |

|                                |                            |           |          |           |          |           |          |
|--------------------------------|----------------------------|-----------|----------|-----------|----------|-----------|----------|
| 268                            | 2-Methyl-pentanoic acid    | 9393528   | 619973   | 17327617  | 1143623  | 19652412  | 1297059  |
| 269                            | 4-Methyl-pentanoic acid    | 2034790   | 136331   | 5906270   | 395720   | 1689525   | 113198   |
| 270                            | Hexanoic acid              | 99437     | 6762     | 192133007 | 13065044 | 946924652 | 64390876 |
| 271                            | 5-Methyl-hexanoic acid     | -         | -        | 3935137   | 271524   | 6769640   | 467105   |
| 272                            | 2-Ethyl-hexanoic acid      | 502029    | 35142    | 417142    | 29200    | 371061    | 25974    |
| 273                            | Heptanoic acid             | 2974207   | 211169   | 634488    | 45049    | 39870952  | 2830838  |
| 274                            | (E)-2-Hexenoic acid        | 1115221   | 80296    | -         | -        | -         | -        |
| 275                            | Octanoic acid              | 38644     | 2821     | 51017     | 3724     | 193672    | 14138    |
| 276                            | (E,E)-2,4-Hexadienoic acid | 74202     | 5491     | -         | -        | -         | -        |
| 277                            | Nonanoic acid              | 3585653   | 268924   | 6230753   | 467306   | 117114    | 8784     |
| 278                            | Decanoic acid              | 7805237   | 593198   | 35230     | 2677     | 211400    | 16066    |
| 279                            | Benzoic acid               | 1203777   | 92691    | 17849975  | 1374448  | 28129719  | 2165988  |
| 280                            | Benzeneacetic acid         | 52428     | 4089     | -         | -        | 16367863  | 1276693  |
| 281                            | Tetradecanoic acid         | 253125    | 19997    | 178501    | 14102    | 29876     | 2360     |
| 282                            | Hexadecanoic acid          | -         | -        | -         | -        | 95772     | 7662     |
| 283                            | 9-Hexadecenoic acid        | -         | -        | -         | -        | 671356    | 54380    |
| <b>Aldehydes &amp; ketones</b> |                            |           |          |           |          |           |          |
| 284                            | Acetaldehyde               | 181356316 | 15052574 | -         | -        | 392585    | 32585    |
| 285                            | Propanal                   | 49319     | 4143     | -         | -        | -         | -        |
| 286                            | 2-Propanone                | 3285152   | 279238   | -         | -        | -         | -        |
| 287                            | 2-Methyl-propanal          | 18324322  | 1575892  | -         | -        | -         | -        |

|     |                                |           |          |          |         |           |         |
|-----|--------------------------------|-----------|----------|----------|---------|-----------|---------|
| 288 | 2-Propenal                     | -         | -        | -        | -       | 371057    | 32282   |
| 289 | Butanal                        | 1474142   | 129724   | -        | -       | -         | -       |
| 290 | 1,1-Diethoxy-ethane            | 101685106 | 9049974  | -        | -       | 33992454  | 3025328 |
| 291 | 3-Methyl-butanal               | 271504774 | 24435430 | -        | -       | 45512799  | 4096152 |
| 292 | 3-Buten-2-one                  | -         | -        | -        | -       | 180955    | 16467   |
| 293 | 2,4,5-Trimethyl-1,3-dioxolane  | 25403063  | 1143138  | -        | -       | 47228337  | 2125275 |
| 294 | 1,1-Diethoxy-propane           | 120547    | 5545     | -        | -       | 213016    | 9799    |
| 295 | 2,3-Butanedione                | -         | -        | -        | -       | 5110070   | 240173  |
| 296 | 1,1-Diethoxy-2-methyl-propane  | 18389607  | 882701   | 16550440 | 794421  | 188405523 | 9043465 |
| 297 | 2-Pentanone                    | 41327468  | 2025046  | 46251023 | 2266300 | -         | -       |
| 298 | Pentanal                       | 32262434  | 1613122  | 178348   | 8917    | -         | -       |
| 299 | 2-Methyl-1-buten-3-one         | -         | -        | 2138214  | 109049  | 88643     | 4521    |
| 300 | 4-Methyl-2-pentanone           | -         | -        | 58611    | 3048    | -         | -       |
| 301 | 1,1-Diethoxy-butane            | -         | -        | 2284077  | 121056  | -         | -       |
| 302 | 2-Butenal                      | -         | -        | 1052195  | 56819   | 928422    | 50135   |
| 303 | 1,1-Diethoxy-3-methyl-butane   | 8979970   | 493898   | 20619484 | 1134072 | 1293820   | 71160   |
| 304 | 2-Hexanone                     | -         | -        | 172435   | 9656    | -         | -       |
| 305 | 2,4,6-Trimethyl-1,3,5-trioxane | -         | -        | 29408136 | 1676264 | 2732906   | 155776  |
| 306 | Hexanal                        | 128266988 | 7439485  | 56286076 | 3264592 | 99121793  | 5749064 |
| 307 | 2-Methyl-2-butenal             | 1006218   | 59367    | 125934   | 7430    | -         | -       |
| 308 | E-2-Methyl-2-butenal           | -         | -        | -        | -       | 1024612   | 61477   |

|     |                           |          |         |          |         |           |         |
|-----|---------------------------|----------|---------|----------|---------|-----------|---------|
| 309 | 4-Heptanone               | -        | -       | 91812    | 5601    | -         | -       |
| 310 | (E)-3-Penten-2-one        | -        | -       | 1152885  | 71479   | -         | -       |
| 311 | 4-Methyl-3-penten-2-one   | -        | -       | 688612   | 43383   | -         | -       |
| 312 | 5-Methyl-2-hexanone       | -        | -       | 404764   | 25905   | -         | -       |
| 313 | 2-Methyl-2-pentenal       | -        | -       | 175533   | 11410   | -         | -       |
| 314 | Acetyl valeryl            | 1239890  | 81833   | 18385474 | 1213441 | 28973611  | 1912258 |
| 315 | Heptanal                  | 8068689  | 540602  | 602907   | 40395   | 100994258 | 6766615 |
| 316 | 2-Heptanone               | 232875   | 15836   | 164221   | 11167   | 27486     | 1869    |
| 317 | Cyclopentanone            | 952142   | 65698   | 914785   | 63120   | 1092964   | 75415   |
| 318 | 3-Ethoxy-propanal         | 579862   | 40590   | -        | -       | -         | -       |
| 319 | 2-Methyl-cyclopentanone   | -        | -       | 164981   | 11714   | -         | -       |
| 320 | 1,1-Diethoxy-hexane       | -        | -       | 324866   | 23390   | 1268822   | 91355   |
| 321 | 1-(1-Ethoxyethoxy)-hexane | 8703158  | 635331  | 3354472  | 244876  | -         | -       |
| 322 | 3-Hydroxy-2-butanone      | 5154540  | 381436  | -        | -       | 2001084   | 148080  |
| 323 | 1,1,3-Triethoxy-dutane    | -        | -       | 23047307 | 1728548 | -         | -       |
| 324 | Cyclohexanone             | -        | -       | 3822334  | 290497  | -         | -       |
| 325 | 1,1,3-Triethoxy-propane   | -        | -       | 32531620 | 2504935 | 24029720  | 1850288 |
| 326 | 2-Octanone                | 20852174 | 1626470 | 4395146  | 342821  | 40555876  | 3163358 |
| 327 | Octanal                   | 17740693 | 1401515 | 1770799  | 139893  | 19938177  | 1575116 |
| 328 | 4-Nonanone                | -        | -       | 806858   | 64549   | -         | -       |
| 329 | 1,1-Diethoxy-heptane      | -        | -       | 373778   | 33640   | -         | -       |

|     |                                |          |         |         |        |          |        |
|-----|--------------------------------|----------|---------|---------|--------|----------|--------|
| 330 | (E)-2-Heptenal                 | -        | -       | 502188  | 50219  | -        | -      |
| 331 | 2,2,6-Trimethyl-cyclohexanone  | -        | -       | -       | -      | 4387932  | 482673 |
| 332 | Ethyl orthoformate             | 163487   | 9809    | -       | -      | -        | -      |
| 333 | (Z)-2-Heptenal                 | 795305   | 49309   | -       | -      | 984253   | 61024  |
| 334 | 2-Ethyl-2-hexenal              | -        | -       | -       | -      | 1744476  | 111646 |
| 335 | 6-Methyl-5-heptene-2-one       | 672711   | 44399   | 629434  | 41543  | 4644721  | 306552 |
| 336 | 2-Nonanone                     | 58785486 | 3997413 | 6522811 | 443551 | -        | -      |
| 337 | 2-Cyclopenten-1-one            | -        | -       | 2922533 | 204577 | 442202   | 30954  |
| 338 | 2-Isopropyl-5-methyl-2-hexenal | 2215272  | 159500  | -       | -      | 228183   | 16429  |
| 339 | 2-Methyl-2-cyclopenten-1-one   | -        | -       | 163606  | 12107  | 205959   | 15241  |
| 340 | Nonanal                        | 400530   | 30440   | 684113  | 51993  | 10576477 | 803812 |
| 341 | 3-Octen-2-one                  | 2805109  | 218799  | -       | -      | 7138085  | 556771 |
| 342 | 1,1-Diethoxy-octane            | 59652    | 4772    | -       | -      | -        | -      |
| 343 | 2-Octenal                      | 3062580  | 251132  | 644961  | 52887  | -        | -      |
| 344 | (E)-2-Octenal                  | -        | -       | -       | -      | 138067   | 11598  |
| 345 | 2-Nonen-4-one                  | 1074678  | 92422   | -       | -      | -        | -      |
| 346 | 2-Decanone                     | 277188   | 24393   | 561182  | 49384  | -        | -      |
| 347 | Decanal                        | 3529810  | 250617  | 135833  | 9644   | 821374   | 58318  |
| 348 | 3-Nonen-2-one                  | 3146920  | 226578  | 54808   | 3946   | 524472   | 37762  |
| 349 | 1,1-Diethoxy-nonane            | 63989906 | 4671263 | 377189  | 27535  | 9386775  | 685235 |
| 350 | 6-Undecanone                   | 836137   | 61874   | -       | -      | -        | -      |

|     |                                   |          |         |          |         |          |         |
|-----|-----------------------------------|----------|---------|----------|---------|----------|---------|
| 351 | Benzaldehyde                      | 117646   | 8823    | 56163    | 4212    | 5899766  | 442482  |
| 352 | 2,3-Dimethyl-2-cyclopentenone     | -        | -       | 84347    | 6410    | -        | -       |
| 353 | 3-Undecanone                      | 1991440  | 153341  | -        | -       | -        | -       |
| 354 | 3,5-(E,E)-Octadien-2-one          | 114005   | 8892    | -        | -       | -        | -       |
| 355 | (E,Z)-2,6-Nonadienal              | 254826   | 20131   | -        | -       | 408843   | 32299   |
| 356 | 2-Undecanone                      | 30253439 | 2420275 | 1972097  | 157768  | 3471343  | 277707  |
| 357 | (3E)-6-Methyl-3,5-heptadien-2-one | -        | -       | -        | -       | 989063   | 80114   |
| 358 | Undecanal                         | 1037587  | 85082   | -        | -       | -        | -       |
| 359 | 1,1-Diethoxydecane                | 583359   | 48419   | 394313   | 32728   | -        | -       |
| 360 | 2-Methyl-Benzaldehyde             | -        | -       | -        | -       | 582697   | 48947   |
| 361 | 3-Methyl-Benzaldehyde             | 494499   | 42032   | 196231   | 16680   | 1122432  | 95407   |
| 362 | 4-Methyl-Benzaldehyde             | 102755   | 8837    | 78652    | 6764    | -        | -       |
| 363 | (E)-2-Decenal                     | -        | -       | 49459    | 2572    | -        | -       |
| 364 | (Z)-2-Decenal                     | 1724434  | 91395   | -        | -       | 726162   | 38487   |
| 365 | Phenylethanal                     | 34409478 | 1858112 | 36237395 | 1956819 | 49808940 | 2689683 |
| 366 | Acetophenone                      | 14801364 | 814075  | 27343283 | 1503881 | 54879434 | 3018369 |
| 367 | Cryptone                          | -        | -       | -        | -       | 271168   | 15185   |
| 368 | 6,10-Dimethyl-2-undecanone        | 1474840  | 84066   | -        | -       | -        | -       |
| 369 | Carvotanacetone                   | 2398203  | 139096  | 609463   | 35349   | 5743850  | 333143  |
| 370 | 2-Hydroxy-benzaldehyde            | 10978709 | 647744  | 603877   | 35629   | 1919386  | 113244  |
| 371 | (E,E)-2,4-Nonadienal              | 1404433  | 84266   | 285180   | 17111   | 1978499  | 118710  |



|     |                                   |          |         |          |         |          |         |
|-----|-----------------------------------|----------|---------|----------|---------|----------|---------|
| 372 | Dodecanal                         | 546078   | 33311   | -        | -       | -        | -       |
| 373 | (2,2-Diethoxyethyl)-benzene       | 25083741 | 1555192 | 24337649 | 1508934 | 51568845 | 3197268 |
| 374 | 4-Ethyl-benzaldehyde              | 314236   | 19797   | -        | -       | 672073   | 42341   |
| 375 | p-Menth-1-en-7-al                 | 118146   | 7561    | -        | -       | -        | -       |
| 376 | 1-Phenyl-1-propanone              | 2111485  | 137247  | 1288759  | 83769   | 7198327  | 467891  |
| 377 | p-Menth-1-en-3-one                | 215837   | 14245   | -        | -       | 835548   | 55146   |
| 378 | 4-(1-Methylethyl)-benzaldehyde    | 504956   | 33832   | 138060   | 9250    | -        | -       |
| 379 | 1-(4-Methylphenyl)-ethanone       | -        | -       | 912243   | 62033   | -        | -       |
| 380 | 1-Phenyl-1-butanone               | 2079272  | 143470  | 578309   | 39903   | 5088600  | 351113  |
| 381 | 4-Phenyl-2-butanone               | 87718    | 6140    | 107397   | 7518    | 206603   | 14462   |
| 382 | 5-(2-Propenyl)-1,3-benzodioxole   | -        | -       | 442960   | 31450   | 3100679  | 220148  |
| 383 | 4-Hydroxy-2-methylacetophenone    | -        | -       | -        | -       | 400952   | 28869   |
| 384 | 2-Phenyl-2-butenal                | 2307212  | 168426  | 5339681  | 389797  | 7661878  | 559317  |
| 385 | 4-Methyl-2-phenyl-2-pentenal      | 164020   | 12137   | -        | -       | 473812   | 35062   |
| 386 | Maltol                            | -        | -       | -        | -       | 124309   | 9323    |
| 387 | 2-Pentadecanone                   | 4365253  | 331759  | -        | -       | -        | -       |
| 388 | 5-Methyl-2-phenyl-2-hexenal       | 243353   | 18738   | -        | -       | 368530   | 28377   |
| 389 | 6,10,14-Trimethyl-2-pentadecanone | -        | -       | 281093   | 21925   | 1196916  | 93359   |
| 390 | 1-(4-Methoxyphenyl)-ethanone      | 78180    | 6176    | -        | -       | 1115619  | 88134   |
| 391 | 1-(3-Methoxyphenyl)-ethanone      | -        | -       | 758048   | 60644   | -        | -       |
| 392 | 1-(4-Methoxyphenyl)-2-propanone   | 861667   | 69795   | -        | -       | 1241050  | 100525  |

|               |                                           |          |        |          |         |          |         |
|---------------|-------------------------------------------|----------|--------|----------|---------|----------|---------|
| 393           | 4-Methoxy-6-(2-propenyl)-1,3-benzodioxole | -        | -      | 15014    | 1231    | -        | -       |
| 394           | 1-(2-Hydroxy-4-methoxyphenyl)-ethanone    | 1114047  | 92466  | 7130673  | 591846  | 35758106 | 2967923 |
| <b>Furans</b> |                                           |          |        |          |         |          |         |
| 395           | Furan                                     | 172934   | 14699  | -        | -       | -        | -       |
| 396           | 2-Methyl-furan                            | 436832   | 37568  | -        | -       | 321009   | 27607   |
| 397           | 2-Ethyl-furan                             | 1059254  | 92155  | -        | -       | -        | -       |
| 398           | Dihydro-2-methyl-3(2H)-furanone           | -        | -      | 150296   | 13226   | -        | -       |
| 399           | 3-Furaldehyde                             | -        | -      | 174983   | 15573   | 38084    | 3389    |
| 400           | 2-Furaldehyde diethyl acetal              | 3555099  | 319959 | -        | -       | -        | -       |
| 401           | 2-Furancarboxaldehyde                     | 364666   | 33185  | 391630   | 35638   | 1622244  | 147624  |
| 402           | Benzofuran                                | -        | -      | 1505419  | 67744   | 3012525  | 135564  |
| 403           | 1-(2-Furanyl)-ethanone                    | 8607724  | 395955 | 40218887 | 1850069 | 161782   | 7442    |
| 404           | Tetrahydro-2-furanmethanol                | 547159   | 25716  | -        | -       | -        | -       |
| 405           | 1-(2-Furanyl)-1-propanone                 | -        | -      | 12379787 | 594230  | 1619844  | 77753   |
| 406           | 5-Methyl-furfural                         | 10612803 | 520027 | 149297   | 7316    | 63093    | 3092    |
| 407           | Furfuryl propionate                       | -        | -      | -        | -       | 759547   | 37977   |
| 408           | 2-Methyl-benzofuran                       | 1188841  | 60631  | -        | -       | -        | -       |
| 409           | 2-Furfurylfuran                           | 896111   | 46598  | -        | -       | 671878   | 34938   |
| 410           | 2-Acetyl-5-methylfuran                    | 421734   | 22352  | 82894    | 4393    | -        | -       |
| 411           | Ethyl 2-furoate                           | 17686773 | 955086 | 23094921 | 1247126 | 59239552 | 3198936 |
| 412           | 5-Ethyl-2-furaldehyde                     | 109327   | 6013   | 238626   | 13124   | 227458   | 12510   |

|                           |                           |          |         |         |        |          |        |
|---------------------------|---------------------------|----------|---------|---------|--------|----------|--------|
| 413                       | 2-Furanmethanol           | 1506672  | 84374   | -       | -      | 623303   | 34905  |
| 414                       | 2-Butanoylfuran           | -        | -       | 199444  | 11368  | 3703913  | 211123 |
| 415                       | Furfuryl butyrate         | 3273188  | 189845  | 605070  | 35094  | 728212   | 42236  |
| 416                       | 2-Furfuryl-5-methylfuran  | 222510   | 13128   | -       | -      | -        | -      |
| 417                       | 5-Methyl-2-propionylfuran | -        | -       | 449847  | 26991  | 851433   | 51086  |
| 418                       | Propyl 2-furoate          | 910682   | 55552   | 262400  | 16006  | 2450323  | 149470 |
| 419                       | Furfuryl pentanoate       | 105224   | 6524    | 47345   | 2935   | 90878    | 5634   |
| 420                       | Furfuryl hexanoate        | 22084209 | 1391305 | 3719716 | 234342 | 12013859 | 756873 |
| 421                       | 2-Hexanoylfuran           | -        | -       | -       | -      | 840142   | 53769  |
| 422                       | Dibenzofuran              | 2293934  | 149106  | 543148  | 35305  | 167174   | 10866  |
| 423                       | 5-Hydroxymethylfurfural   | -        | -       | 364833  | 24079  | 74330    | 4906   |
| <b>Nitrogen compounds</b> |                           |          |         |         |        |          |        |
| 424                       | Pyridine                  | -        | -       | 423182  | 28776  | 994460   | 67623  |
| 425                       | Trimethyl-oxazole         | -        | -       | 406865  | 28074  | -        | -      |
| 426                       | Pyrazine                  | -        | -       | -       | -      | 208214   | 14575  |
| 427                       | 2-Methyl pyrazine         | -        | -       | 83202   | 5907   | -        | -      |
| 428                       | 2,5-Dimethyl-pyrazine     | -        | -       | 702853  | 50605  | 3367077  | 242430 |
| 429                       | 2,6-Dimethyl-pyrazine     | -        | -       | 1913551 | 139689 | -        | -      |
| 430                       | Ethyl-pyrazine            | -        | -       | 267924  | 19826  | -        | -      |
| 431                       | 2,3-Dimethyl-pyrazine     | -        | -       | 1242690 | 93202  | 625362   | 46902  |
| 432                       | Isopropylpyrazine         | -        | -       | 120792  | 9180   | 98578    | 7492   |

|     |                                  |         |        |          |         |          |         |
|-----|----------------------------------|---------|--------|----------|---------|----------|---------|
| 433 | 2-Ethyl-6-methyl-pyrazine        | -       | -      | 1705490  | 131323  | 258352   | 19893   |
| 434 | 2-Methyl-3-isopropylpyrazine     | -       | -      | 87029    | 6788    | -        | -       |
| 435 | 2-Ethyl-5-methyl-pyrazine        | -       | -      | 274812   | 21710   | -        | -       |
| 436 | Trimethyl-pyrazine               | 846909  | 67753  | 8704998  | 696400  | 9491474  | 759318  |
| 437 | 2,6-Diethyl-pyrazine             | -       | -      | -        | -       | 235092   | 21158   |
| 438 | 3-Ethyl-2,5-dimethyl-pyrazine    | 139166  | 13917  | 562146   | 56215   | 738285   | 73829   |
| 439 | 2,3-Dimethyl-5-ethylpyrazine     | -       | -      | 1777799  | 195558  | 2003270  | 220360  |
| 440 | Tetramethyl-pyrazine             | 3234143 | 194049 | 25382464 | 1522948 | 17916862 | 1075012 |
| 441 | 3,5-Diethyl-2-methyl-pyrazine    | -       | -      | -        | -       | 183053   | 11349   |
| 442 | 2,3,5-Trimethyl-6-ethylpyrazine  | -       | -      | -        | -       | 1164356  | 74519   |
| 443 | 1H-Pyrrole                       | 380312  | 25101  | 859338   | 56716   | 594218   | 39218   |
| 444 | 2-Methyl-1H-pyrrole              | -       | -      | -        | -       | 360582   | 24520   |
| 445 | 3-Methyl-1H-pyrrole              | -       | -      | 94848    | 6639    | 893985   | 62579   |
| 446 | 2-Pentyl-Pyridine                | -       | -      | 212086   | 15270   | -        | -       |
| 447 | 2-Formyl-1-methylpyrrole         | -       | -      | 152168   | 11260   | -        | -       |
| 448 | 2-Acetyl-6-methylpyridine        | -       | -      | 358221   | 27225   | -        | -       |
| 449 | 2,3-Dimethyl-5-isopentylpyrazine | -       | -      | -        | -       | 87481    | 6824    |
| 450 | Quinoline                        | -       | -      | 49214    | 3937    | -        | -       |
| 451 | 2-Acetylpyrrole                  | 116000  | 9512   | 1708061  | 140061  | 203061   | 16651   |
| 452 | 2-Formylpyrrole                  | 100422  | 8435   | 787607   | 66159   | -        | -       |

**Sulfur compounds**

|     |                                   |           |          |          |         |          |         |
|-----|-----------------------------------|-----------|----------|----------|---------|----------|---------|
| 453 | Methanethiol                      | 17980056  | 1582245  | -        | -       | 704765   | 62019   |
| 454 | Dimethyl sulfide                  | 353186    | 25076    | -        | -       | -        | -       |
| 455 | Methyl thiolacetate               | 509075    | 36653    | 674068   | 48533   | -        | -       |
| 456 | Dimethyl disulfide                | 185282279 | 13525606 | 92806996 | 6774911 | 40528354 | 2958570 |
| 457 | S-Methyl propanethioate           | 149016    | 11027    | 469766   | 34763   | 452243   | 33466   |
| 458 | Methyl ethyl disulfide            | -         | -        | 228216   | 17116   | -        | -       |
| 459 | S-Methyl ester butanethioic acid  | 21100363  | 1603628  | 29268184 | 2224382 | 8011206  | 608852  |
| 460 | Thiazole                          | -         | -        | 233446   | 17975   | 387213   | 29815   |
| 461 | Dimethyl trisulphide              | 69373     | 5411     | 29336074 | 2288214 | 8989421  | 701175  |
| 462 | S-Methyl hexanethioate            | 34583030  | 2732059  | 3277599  | 258930  | 251289   | 19852   |
| 463 | Methyl pentyl disulfide           | -         | -        | -        | -       | 331673   | 26534   |
| 464 | 4,5-Dimethyl-2-isopropyl-thiazole | -         | -        | -        | -       | 79667    | 6453    |
| 465 | Ethyl 2-(methylthio)acetate       | 154790    | 12693    | -        | -       | -        | -       |
| 466 | Methional                         | 1748093   | 145092   | 1030464  | 85529   | 1675740  | 139086  |
| 467 | 2-Pentyl-thiophene                | 183530    | 15417    | 127659   | 10723   | 385221   | 32359   |
| 468 | Furfuryl methyl sulfide           | 1329630   | 113019   | -        | -       | 1892206  | 160838  |
| 469 | 4,5-Dimethyl-2-isobutylthiazole   | -         | -        | -        | -       | 279987   | 24079   |
| 470 | 2-(Methylthio)ethanol             | 32270     | 1678     | -        | -       | -        | -       |
| 471 | Methyl propyl trisulfide          | 1395732   | 73974    | -        | -       | -        | -       |
| 472 | Ethyl 3-(methylthio)propionate    | 7258259   | 391946   | 4144047  | 223779  | 30640434 | 1654583 |
| 473 | 2,5-Dimethyl-1,3,4-trithiolane    | 223811    | 12310    | -        | -       | 303046   | 16668   |

---

|                |                                  |           |          |          |         |            |          |
|----------------|----------------------------------|-----------|----------|----------|---------|------------|----------|
| 474            | 3-(Methylthio)propyl acetate     | 118146    | 6616     | -        | -       | -          | -        |
| 475            | 2,4,5-Trithiahexane              | 5489595   | 312907   | 1093456  | 62327   | 12531933   | 714320   |
| 476            | Methyl benzyl sulfide            | 192529    | 11167    | -        | -       | 282660     | 16394    |
| 477            | 3-Thiophenecarboxaldehyde        | 305628    | 18032    | 283932   | 16752   | 309785     | 18277    |
| 478            | 2-Thiophenecarboxaldehyde        | 212586147 | 12755169 | 3957333  | 237440  | 1131135359 | 67868122 |
| 479            | Methionol                        | 162384    | 9905     | 150563   | 9184    | 108786     | 6636     |
| 480            | 5-Methyl-2-formylthiophene       | 204230    | 12662    | 87681    | 5436    | 759939     | 47116    |
| 481            | Dimethyl tetrasulphide           | -         | -        | -        | -       | 57620      | 3630     |
| 482            | 1,2,4-Trithiolane                | 246095    | 15750    | -        | -       | 41966      | 2686     |
| 483            | 3-Acetylthiophene                | -         | -        | 139269   | 9052    | -          | -        |
| 484            | 2-Acetylthiophen                 | -         | -        | -        | -       | 459773     | 30345    |
| 485            | Furfuryl methyl disulfide        | 1833204   | 122825   | 1788668  | 119841  | 18687219   | 1252044  |
| 486            | 3-Methyl-2-thiophenecarbaldehyde | 8371934   | 569292   | 540941   | 36784   | 5341662    | 363233   |
| 487            | 1-(2-Thienyl)propanone           | 75104     | 5182     | -        | -       | -          | -        |
| 488            | Benzothiazole                    | 204159    | 14291    | 1184171  | 82892   | 764993     | 53550    |
| 489            | 2-Phenylthiophene                | 104707    | 7434     | -        | -       | -          | -        |
| <b>Phenols</b> |                                  |           |          |          |         |            |          |
| 490            | 2-Methoxy phenol                 | 24190543  | 1765910  | 1626545  | 118738  | 9636718    | 703480   |
| 491            | Di-ter-butyl p-cresol            | 10933508  | 809080   | 2467790  | 182616  | 1688443    | 124945   |
| 492            | 2-Methoxy-4-methylphenol         | 20011936  | 1500895  | 74285744 | 5571431 | 74499491   | 5587462  |
| 493            | Phenol                           | 112323    | 8537     | 39826797 | 3026837 | 199061     | 15129    |

|                 |                            |         |        |          |         |          |         |
|-----------------|----------------------------|---------|--------|----------|---------|----------|---------|
| 494             | 2-Methylphenol             | 1566609 | 120629 | 3671169  | 282680  | 3445312  | 265289  |
| 495             | 2-Methoxy-4-ethylphenol    | 9742421 | 759909 | 23854184 | 1860626 | 57350333 | 4473326 |
| 496             | p-Cresol                   | 66137   | 5225   | 85926604 | 6788202 | 51503723 | 4068794 |
| 497             | 2-Methoxy-4-propylphenol   | 49459   | 3957   | 311353   | 24908   | -        | -       |
| 498             | 3-Ethylphenol              | -       | -      | -        | -       | 772484   | 62571   |
| 499             | 2-tert-Butylphenol         | -       | -      | -        | -       | 38722    | 3175    |
| 500             | 4-Ethylphenol              | 8129380 | 674739 | 23603547 | 1959094 | 46984070 | 3899678 |
| 501             | 5-Methyl-2-isopropylphenol | 426916  | 35861  | 1523874  | 128005  | 1434914  | 120533  |
| 502             | 2-Methoxy-4-vinylphenol    | -       | -      | 751023   | 63837   | -        | -       |
| 503             | 2-Methyl-5-isopropylphenol | 100459  | 8639   | -        | -       | -        | -       |
| 504             | 4-Propylphenol             | 238850  | 20780  | 308508   | 26840   | 2272521  | 197709  |
| 505             | 2,6-Dimethoxyphenol        | -       | -      | 70467    | 6201    | 64359    | 5664    |
| 506             | 2,4-Di-tert-butylphenol    | 426179  | 37930  | 1540199  | 137078  | 925567   | 82375   |
| 507             | 4-Ethenylphenol            | -       | -      | -        | -       | 170578   | 15352   |
| <b>Terpenes</b> |                            |         |        |          |         |          |         |
| 508             | delta-3-Carene             | -       | -      | 275084   | 12379   | -        | -       |
| 509             | $\alpha$ -Limonene         | 505494  | 23253  | 241636   | 11115   | -        | -       |
| 510             | 1,8-Cineole                | 6930888 | 325752 | 582863   | 27395   | 3883944  | 182545  |
| 511             | Terpinolene                | 98328   | 4720   | -        | -       | -        | -       |
| 512             | $\alpha$ -Thujone          | -       | -      | -        | -       | 33943    | 1663    |
| 513             | trans-Linalool oxide       | -       | -      | -        | -       | 703090   | 35155   |

---

|     |                             |          |         |         |        |          |        |
|-----|-----------------------------|----------|---------|---------|--------|----------|--------|
| 514 | cis-Linalool oxide          | 2417631  | 123299  | 2134672 | 108868 | 6046992  | 308397 |
| 515 | $\alpha$ -Longipinene       | 104594   | 5439    | -       | -      | -        | -      |
| 516 | $\alpha$ -Copaene           | -        | -       | -       | -      | 456023   | 24169  |
| 517 | Daucene                     | 267678   | 14455   | -       | -      | -        | -      |
| 518 | Longicyclene                | 3147074  | 173089  | -       | -      | -        | -      |
| 519 | Theaspirane B               | 18610    | 1042    | -       | -      | -        | -      |
| 520 | Camphor                     | 5049195  | 287804  | 1918995 | 109383 | 14350772 | 817994 |
| 521 | (-)-Camphor                 | 11903953 | 690429  | -       | -      | -        | -      |
| 522 | Vitispirane                 | 1255186  | 74056   | -       | -      | 184995   | 10915  |
| 523 | $\alpha$ -Gurjunene         | 5041306  | 302478  | -       | -      | 219694   | 13182  |
| 524 | Linalool                    | 7344560  | 448018  | 1217089 | 74242  | 7146698  | 435949 |
| 525 | Theaspirane                 | 151856   | 9415    | -       | -      | -        | -      |
| 526 | $\alpha$ -Cedrene           | -        | -       | 1087599 | 68519  | -        | -      |
| 527 | Carvomenthone               | 1121930  | 71804   | -       | -      | 337650   | 21610  |
| 528 | $\beta$ -Funebrene          | -        | -       | 107854  | 7011   | 188784   | 12271  |
| 529 | Junipene                    | 14105904 | 930990  | -       | -      | -        | -      |
| 530 | D-Fenchyl alcohol           | 1029951  | 69007   | -       | -      | 1102870  | 73892  |
| 531 | $\alpha$ -trans-Bergamotene | 573526   | 39000   | -       | -      | -        | -      |
| 532 | $\alpha$ -Guaiene           | 1395732  | 96306   | -       | -      | -        | -      |
| 533 | $\beta$ -Elemene            | 2009887  | 140692  | -       | -      | -        | -      |
| 534 | Calarene                    | 30536066 | 2168061 | 1157650 | 82193  | 174785   | 12410  |

---



|     |                       |         |        |         |        |         |        |
|-----|-----------------------|---------|--------|---------|--------|---------|--------|
| 535 | trans-Caryophyllene   | 276168  | 19884  | -       | -      | 264420  | 19038  |
| 536 | Terpinen-4-ol         | 4403323 | 321443 | 319168  | 23299  | 8098403 | 591183 |
| 537 | Isophorone            | 1558470 | 115327 | 56097   | 4151   | 4874869 | 360740 |
| 538 | trans-Edulan          | -       | -      | -       | -      | 202070  | 15155  |
| 539 | $\beta$ -Terpineol    | 180198  | 13695  | -       | -      | -       | -      |
| 540 | $\beta$ -Cyclocitral  | 460377  | 35449  | -       | -      | 508713  | 39171  |
| 541 | $\alpha$ -Patchoulene | 754174  | 58826  | -       | -      | -       | -      |
| 542 | Alloaromadendrene     | 3791114 | 299498 | -       | -      | 168711  | 13328  |
| 543 | $\beta$ -Barbatene    | 444598  | 35568  | -       | -      | -       | -      |
| 544 | $\gamma$ -Gurjunene   | 1566571 | 140991 | -       | -      | -       | -      |
| 545 | Isoborneol            | 71798   | 7180   | -       | -      | -       | -      |
| 546 | $\alpha$ -Humulene    | 137976  | 15177  | -       | -      | 246928  | 27162  |
| 547 | L-Borneol             | 1033708 | 62022  | -       | -      | -       | -      |
| 548 | $\alpha$ -Terpineol   | 5374459 | 333216 | 2556510 | 158504 | -       | -      |
| 549 | $\gamma$ -Amorphene   | 4660098 | 298246 | -       | -      | -       | -      |
| 550 | Ledene                | 1284581 | 84782  | -       | -      | -       | -      |
| 551 | trans-Borneol         | 103216  | 7019   | 2403930 | 163467 | 2237130 | 152125 |
| 552 | $\beta$ -Chamigrene   | 709932  | 49695  | -       | -      | -       | -      |
| 553 | Valencene             | 452235  | 32561  | -       | -      | -       | -      |
| 554 | $\alpha$ -bisabolene  | 3580062 | 264925 | 30207   | 2235   | 240100  | 17767  |
| 555 | Germacrene A          | -       | -      | -       | -      | 412245  | 31331  |

|     |                               |          |         |         |        |         |       |
|-----|-------------------------------|----------|---------|---------|--------|---------|-------|
| 556 | $\alpha$ -Chamigrene          | 50571    | 3945    | -       | -      | 413689  | 32268 |
| 557 | $\delta$ -Cadinene            | 14210759 | 1136861 | 888095  | 71048  | 1008431 | 80674 |
| 558 | $\beta$ -Citronellol          | 432682   | 35480   | -       | -      | -       | -     |
| 559 | 7 epi-a-Selinene              | 228452   | 19190   | -       | -      | -       | -     |
| 560 | $\alpha$ -Curcumene           | 1816428  | 156213  | 103639  | 8913   | -       | -     |
| 561 | Nerol                         | -        | -       | -       | -      | 121972  | 10734 |
| 562 | Isogeraniol                   | -        | -       | -       | -      | 48526   | 3445  |
| 563 | $\beta$ -Damascenone          | 3077793  | 221601  | -       | -      | 547245  | 39402 |
| 564 | Dihydro- $\beta$ -ionone      | 476858   | 34811   | 92771   | 6772   | 184811  | 13491 |
| 565 | L-calamenene                  | 58939    | 4361    | 76061   | 5629   | 43873   | 3247  |
| 566 | Geraniol                      | 552207   | 41416   | -       | -      | 699664  | 52475 |
| 567 | trans-Geranylacetone          | 12870057 | 978124  | 3980433 | 302513 | -       | -     |
| 568 | Geosmin                       | 932703   | 71818   | 563398  | 43382  | 67246   | 5178  |
| 569 | $\alpha$ -Ionone              | 186518   | 14548   | -       | -      | -       | -     |
| 570 | $\alpha$ -Dehydro-himachalene | 125865   | 9943    | -       | -      | -       | -     |
| 571 | $\alpha$ -Calacorene          | 113310   | 9065    | 55107   | 4409   | 53888   | 4311  |
| 572 | Palustrol                     | 691765   | 56033   | 209429  | 16964  | 212867  | 17242 |
| 573 | trans- $\beta$ -Ionone        | 278310   | 22821   | 80845   | 6629   | 447927  | 36730 |
| 574 | cis-Jasmone                   | -        | -       | -       | -      | 45823   | 3803  |
| 575 | $\beta$ -Caryophyllene oxide  | 109293   | 9181    | 143285  | 12036  | 21429   | 1800  |
| 576 | D-Nerolidol                   | 348336   | 29609   | -       | -      | 400307  | 34026 |

|                 |                                            |          |         |         |       |         |        |
|-----------------|--------------------------------------------|----------|---------|---------|-------|---------|--------|
| 577             | E-Nerolidol                                | -        | -       | 422257  | 36314 | -       | -      |
| 578             | Epicubanol                                 | 113310   | 5892    | -       | -     | -       | -      |
| 579             | $\alpha$ -Corocalene                       | 84119    | 4458    | -       | -     | -       | -      |
| 580             | Cubanol                                    | -        | -       | 95976   | 5183  | -       | -      |
| 581             | 6-Isocedrol                                | 167743   | 9226    | -       | -     | -       | -      |
| 582             | $\alpha$ -Cedrol                           | -        | -       | 1018100 | 57014 | 1263118 | 70735  |
| 583             | $\beta$ -Bisabolol                         | -        | -       | -       | -     | 119517  | 6812   |
| 584             | Torreyol                                   | -        | -       | 496264  | 28783 | 764401  | 44335  |
| 585             | $\alpha$ -Cadinol                          | 634215   | 37419   | -       | -     | 966611  | 57030  |
| 586             | $\alpha$ -Eudesmol                         | -        | -       | -       | -     | 133851  | 8031   |
| 587             | $\beta$ -Eudesmol                          | -        | -       | -       | -     | 1133257 | 69129  |
| 588             | Farnesol                                   | -        | -       | 54435   | 3375  | -       | -      |
| 589             | 9H-Fluorene                                | -        | -       | 260964  | 16441 | 703901  | 44346  |
| <b>Lactones</b> |                                            |          |         |         |       |         |        |
| 590             | $\gamma$ -Pentalactone                     | 1944867  | 126416  | -       | -     | 61953   | 4027   |
| 591             | Butyrolactone                              | 1923674  | 126962  | 710199  | 46873 | 498097  | 32874  |
| 592             | $\gamma$ -Vinyl- $\gamma$ -valerolactone   | -        | -       | 607048  | 40672 | -       | -      |
| 593             | $\gamma$ -Caprolactone                     | 29462109 | 2003423 | -       | -     | -       | -      |
| 594             | $\alpha$ -Methyl- $\gamma$ -crotonolactone | -        | -       | 267712  | 18472 | 7637688 | 527000 |
| 595             | 3,4-Dimethyl-2,5-furandione                | -        | -       | 131962  | 9237  | -       | -      |
| 596             | $\gamma$ -Crotonolactone                   | -        | -       | 1374282 | 97574 | 2203820 | 156471 |

|     |                                                |         |        |         |        |         |        |
|-----|------------------------------------------------|---------|--------|---------|--------|---------|--------|
| 597 | $\delta$ -Hexalactone                          | 651278  | 46892  | 1363211 | 98151  | 753277  | 54236  |
| 598 | $\gamma$ -Octalactone                          | -       | -      | 84613   | 6177   | 3953827 | 288629 |
| 599 | $\delta$ -Octalactone                          | -       | -      | 118699  | 8784   | 433161  | 32054  |
| 600 | $\gamma$ -Nonalactone                          | 8263612 | 619771 | -       | -      | -       | -      |
| 601 | $\gamma$ -Carboethoxy- $\gamma$ -butyrolactone | -       | -      | -       | -      | 89450   | 6798   |
| 602 | $\gamma$ -Decalactone                          | 1101223 | 84794  | 122264  | 9414   | 8383106 | 645499 |
| 603 | $\delta$ -Decalactone                          | -       | -      | 25976   | 2026   | 1057780 | 82507  |
| 604 | $\gamma$ -Dodecalactone                        | -       | -      | 58387   | 4613   | -       | -      |
| 605 | $\gamma$ -6-(Z)-Dodecenolactone                | 342131  | 27370  | 1534696 | 122776 | 9342063 | 747365 |
| 606 | $\delta$ -Heptyl- $\delta$ -valerolactone      | -       | -      | -       | -      | 681955  | 55238  |

<sup>a</sup>: Peak area of each compound from different extract method.
